# Supplementary material
Source: ML conference proceedings conference paper supplement (https://openreview.net/forum?id=oTtuEMLgM8)
Supplement: supplementary_material [file attachment]

# Supplementary Materials for "DCAFuse: Dual-Branch Diffusion-CNN Complementary Feature Aggregation Network for Multi-Modality Image Fusion"

Anonymous Authors

## 1 VISUAL RESULTS OF MEDICAL IMAGE FUSION

Fig. 1 and Fig. 2 show the visual results of our proposed DCAFuse along with seven state-of-the-art methods (i.e., U2Fusion [4], SDNet [6], SwinFusion [2], TarDAL [1], CDDFuse [7], DDFM [8] and DifFusion [5]) on MRI-CT and MRI-SPECT datasets [3].

## REFERENCES

- [1] Jinyuan Liu, Xin Fan, Zhanbo Huang, Guanyao Wu, Risheng Liu, Wei Zhong, and Zhongxuan Luo. 2022. Target-aware dual adversarial learning and a multi-scenario multi-modality benchmark to fuse infrared and visible for object detection. In *Proceedings of the IEEE/CVF conference on computer vision and pattern recognition*. 5802–5811.
- [2] Jiayi Ma, Linfeng Tang, Fan Fan, Jun Huang, Xiaoguang Mei, and Yong Ma. 2022. SwinFusion: Cross-domain long-range learning for general image fusion via swin transformer. *IEEE/CAA Journal of Automatica Sinica* 9, 7 (2022), 1200–1217.
- [3] Harvard medical website. 1999. The Whole Brain Atlas. <http://www.med.harvard.edu/AANLIB/home.html>.
- [4] Han Xu, Jiayi Ma, Junjun Jiang, Xiaojie Guo, and Haibin Ling. 2020. U2Fusion: A unified unsupervised image fusion network. *IEEE Transactions on Pattern Analysis and Machine Intelligence* 44, 1 (2020), 502–518.
- [5] Jun Yue, Leyuan Fang, Shaobo Xia, Yue Deng, and Jiayi Ma. 2023. Dif-fusion: Towards high color fidelity in infrared and visible image fusion with diffusion models. *IEEE Transactions on Image Processing* (2023).
- [6] Hao Zhang and Jiayi Ma. 2021. SDNet: A versatile squeeze-and-decomposition network for real-time image fusion. *International Journal of Computer Vision* 129, 10 (2021), 2761–2785.
- [7] Zixiang Zhao, Haowen Bai, Jianshe Zhang, Yulun Zhang, Shuang Xu, Zudi Lin, Radu Timofte, and Luc Van Gool. 2023. Cddfuse: Correlation-driven dual-branch feature decomposition for multi-modality image fusion. In *Proceedings of the IEEE/CVF conference on computer vision and pattern recognition*. 5906–5916.
- [8] Zixiang Zhao, Haowen Bai, Yuanzhi Zhu, Jianshe Zhang, Shuang Xu, Yulun Zhang, Kai Zhang, Deyu Meng, Radu Timofte, and Luc Van Gool. 2023. DDFM: denoising diffusion model for multi-modality image fusion. In *Proceedings of the IEEE/CVF International Conference on Computer Vision*. 8082–8093.

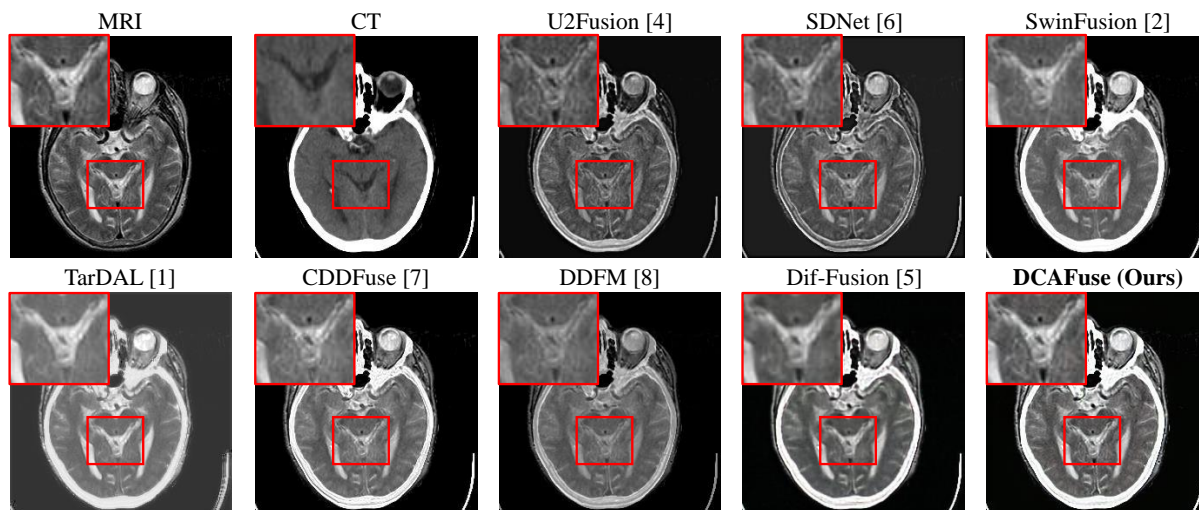

Figure 1: Visual comparison on MRI-CT MIF dataset [3].

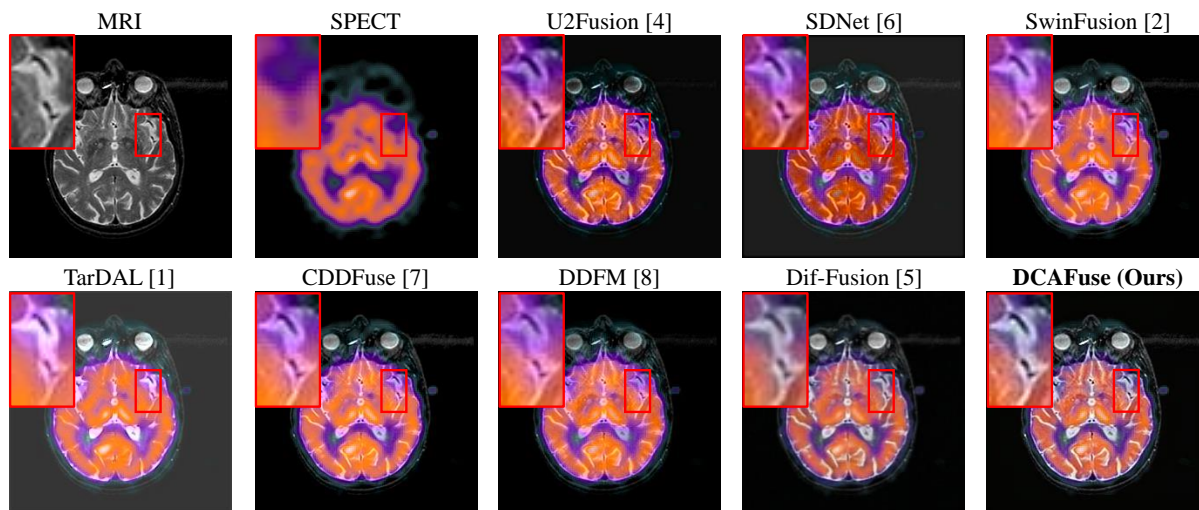

Figure 2: Visual comparison on MRI-SPECT MIF dataset [3].
