# Supplementary material
Source: ML conference proceedings conference paper supplement (https://openreview.net/forum?id=oTtuEMLgM8)

MRI

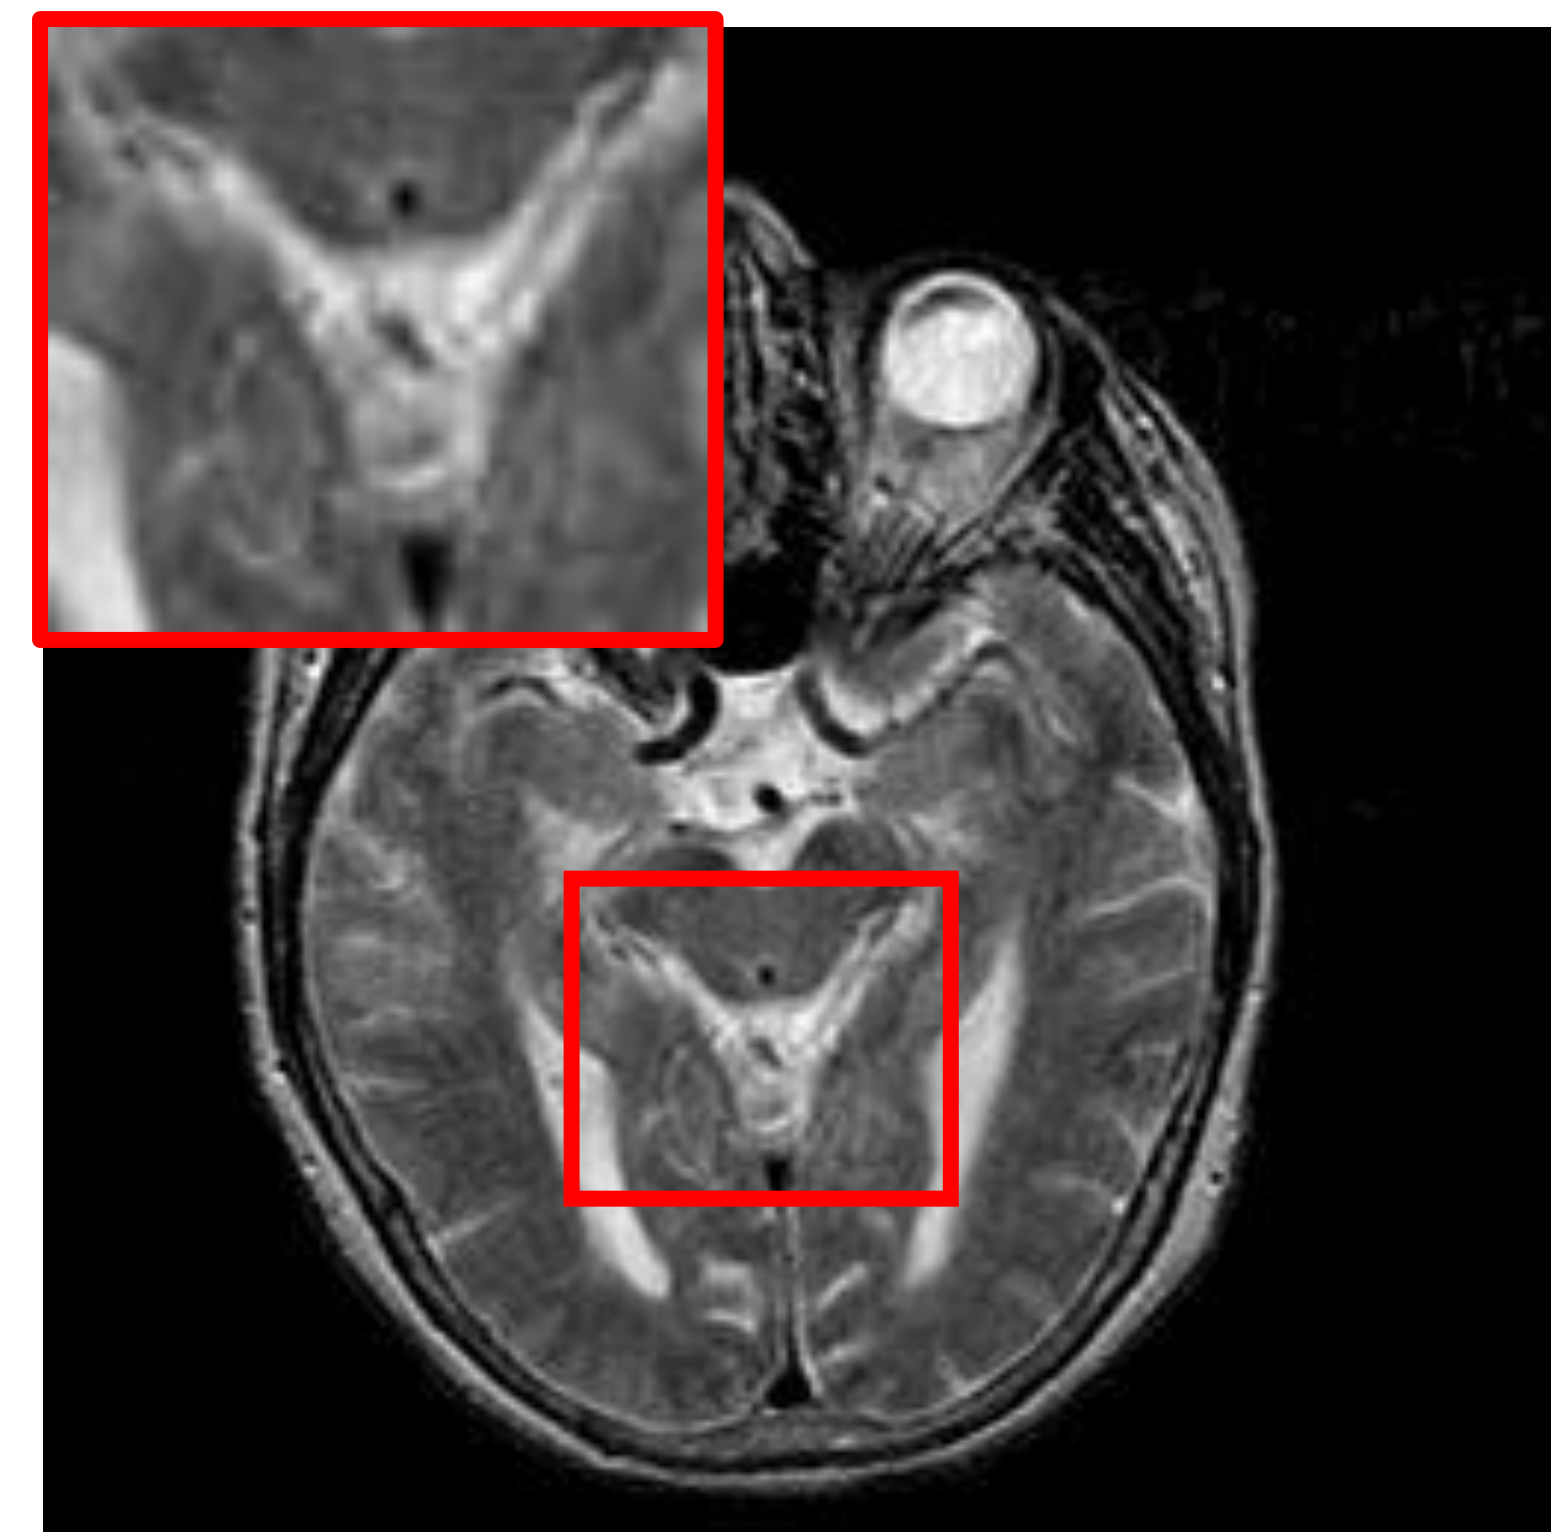

CT

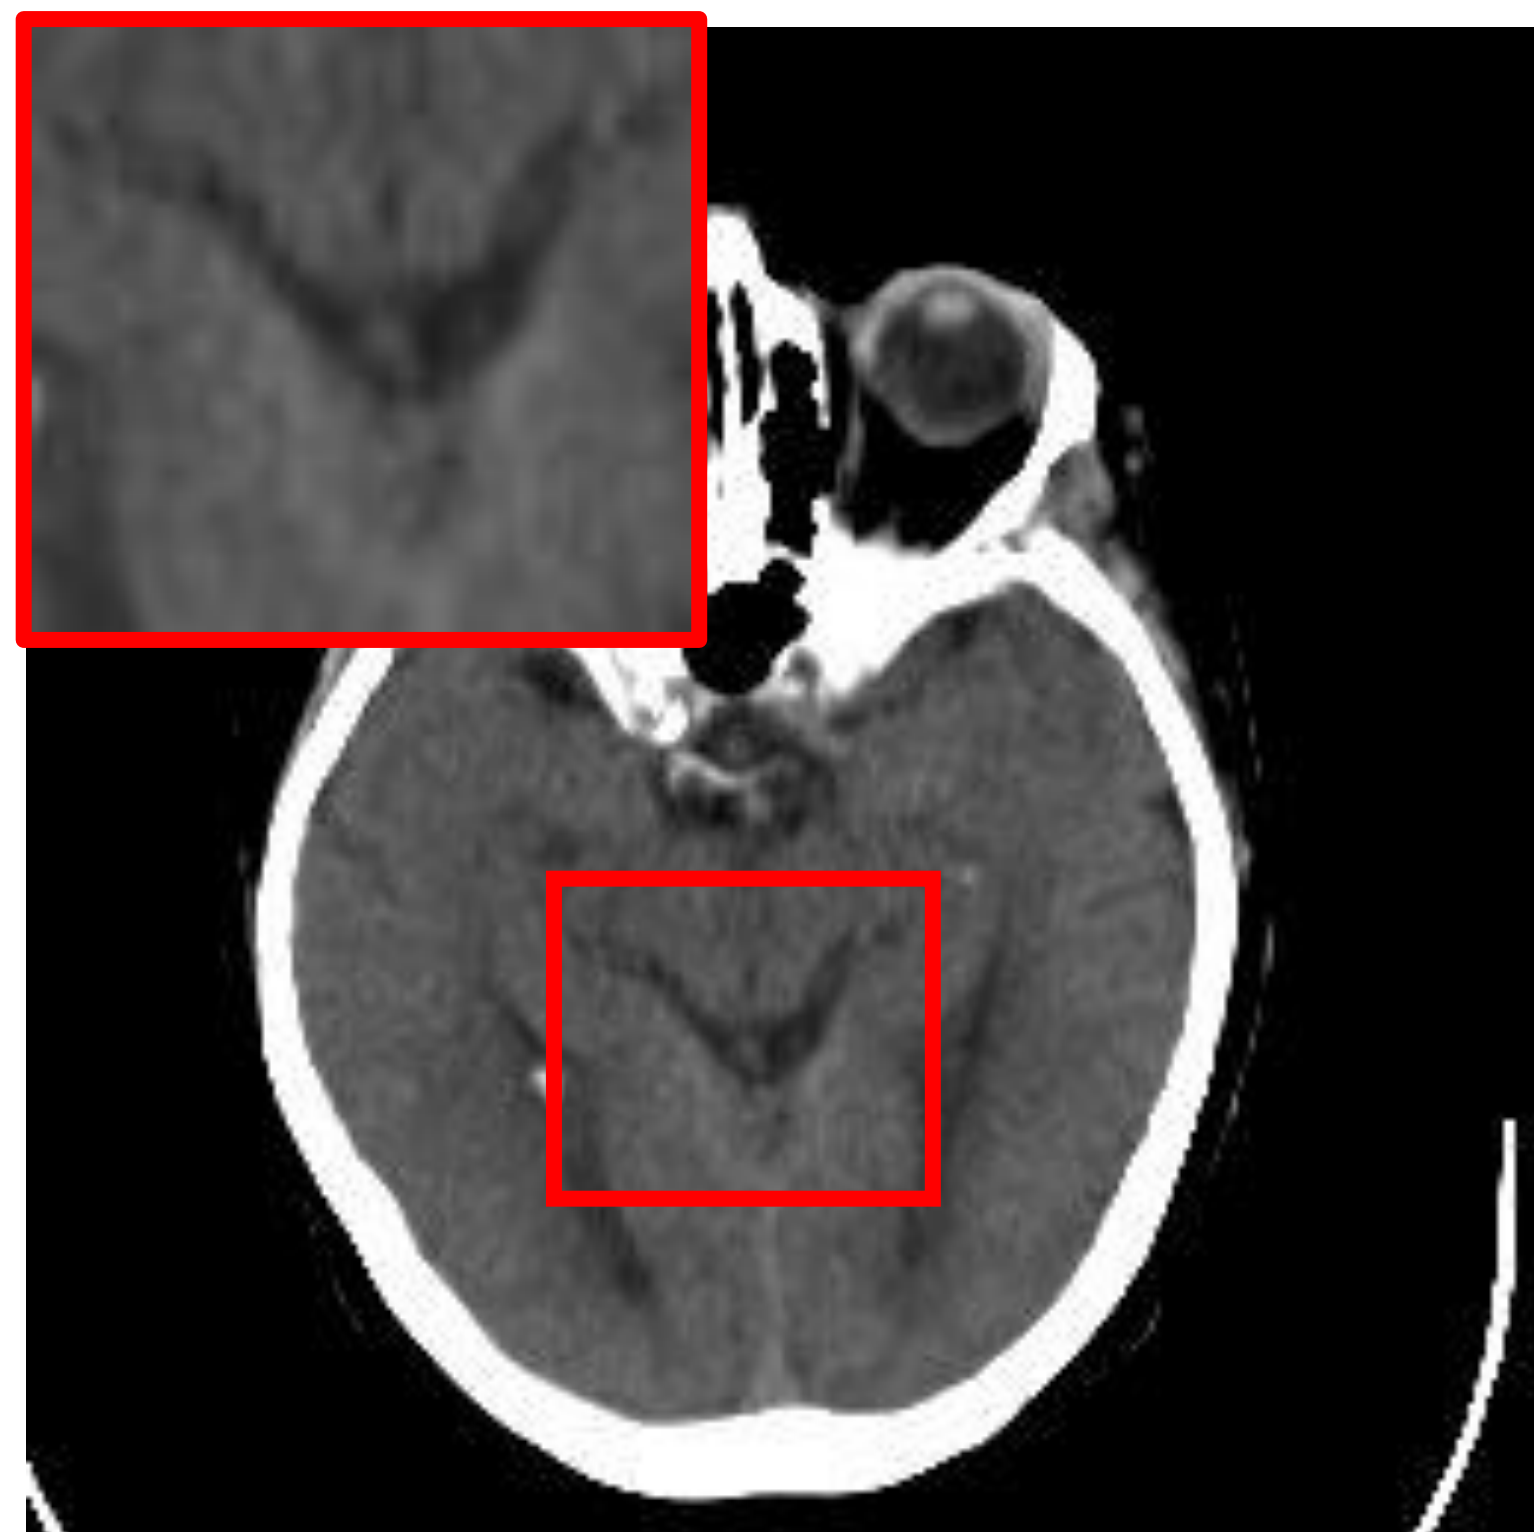

U2Fusion [4]

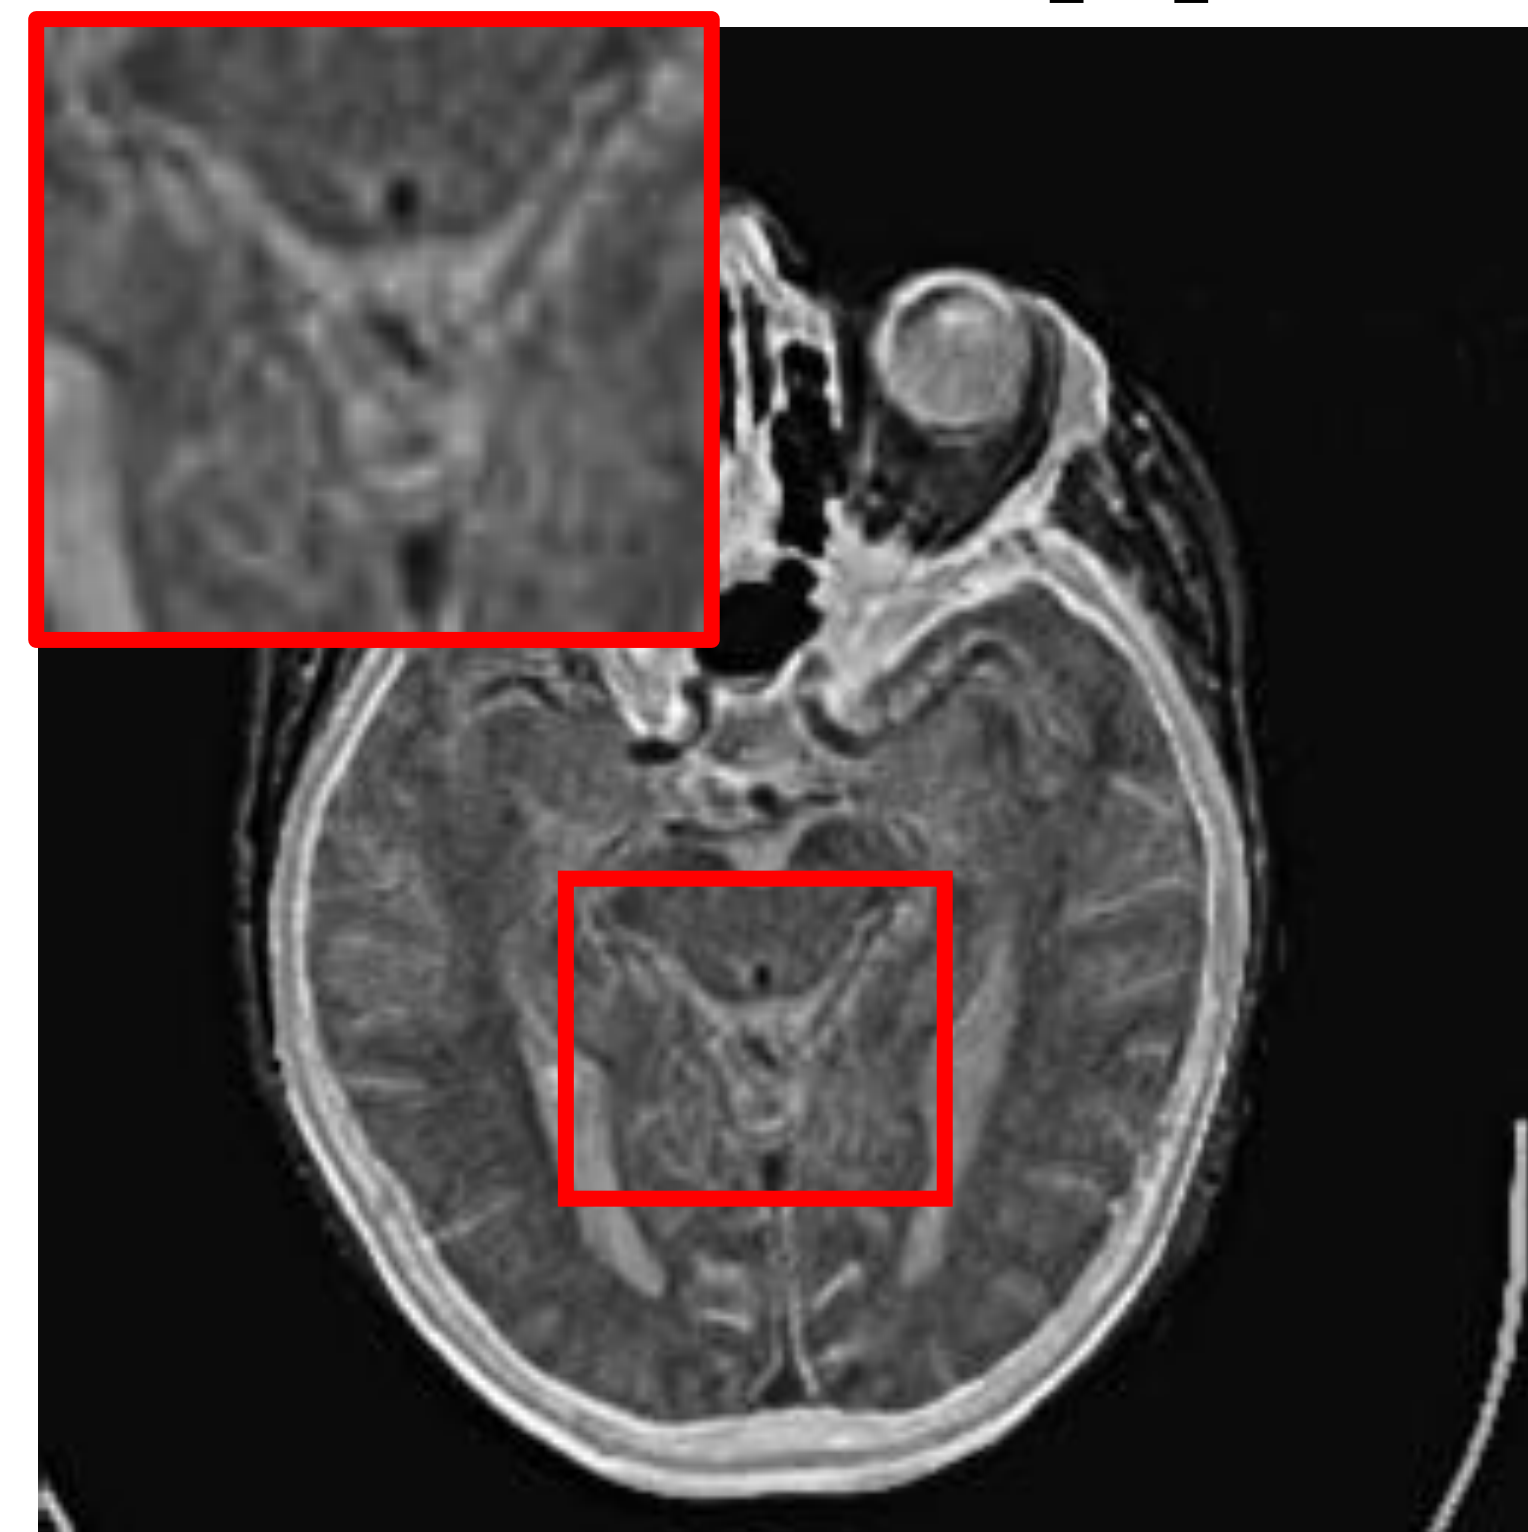

SDNet [6]

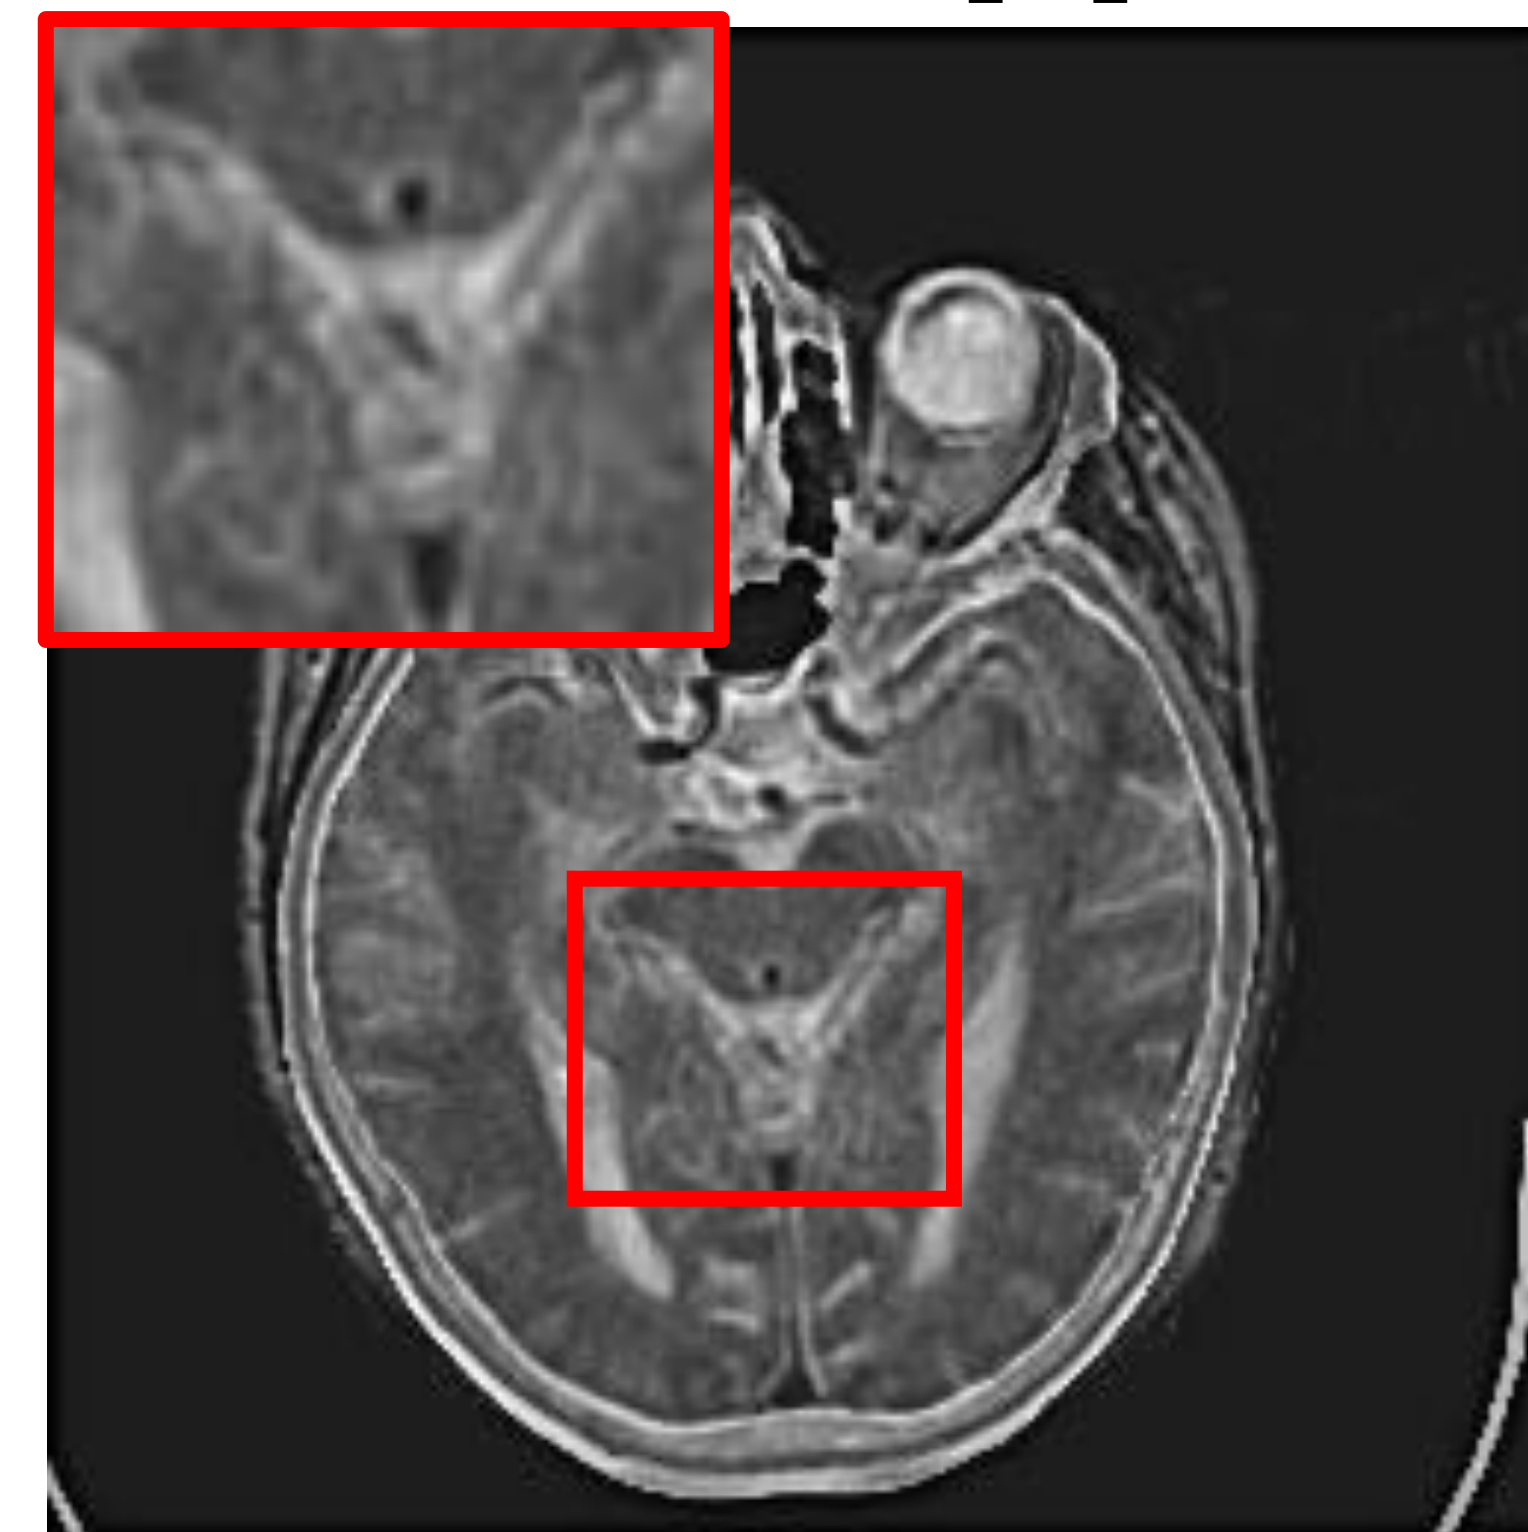

SwinFusion [2]

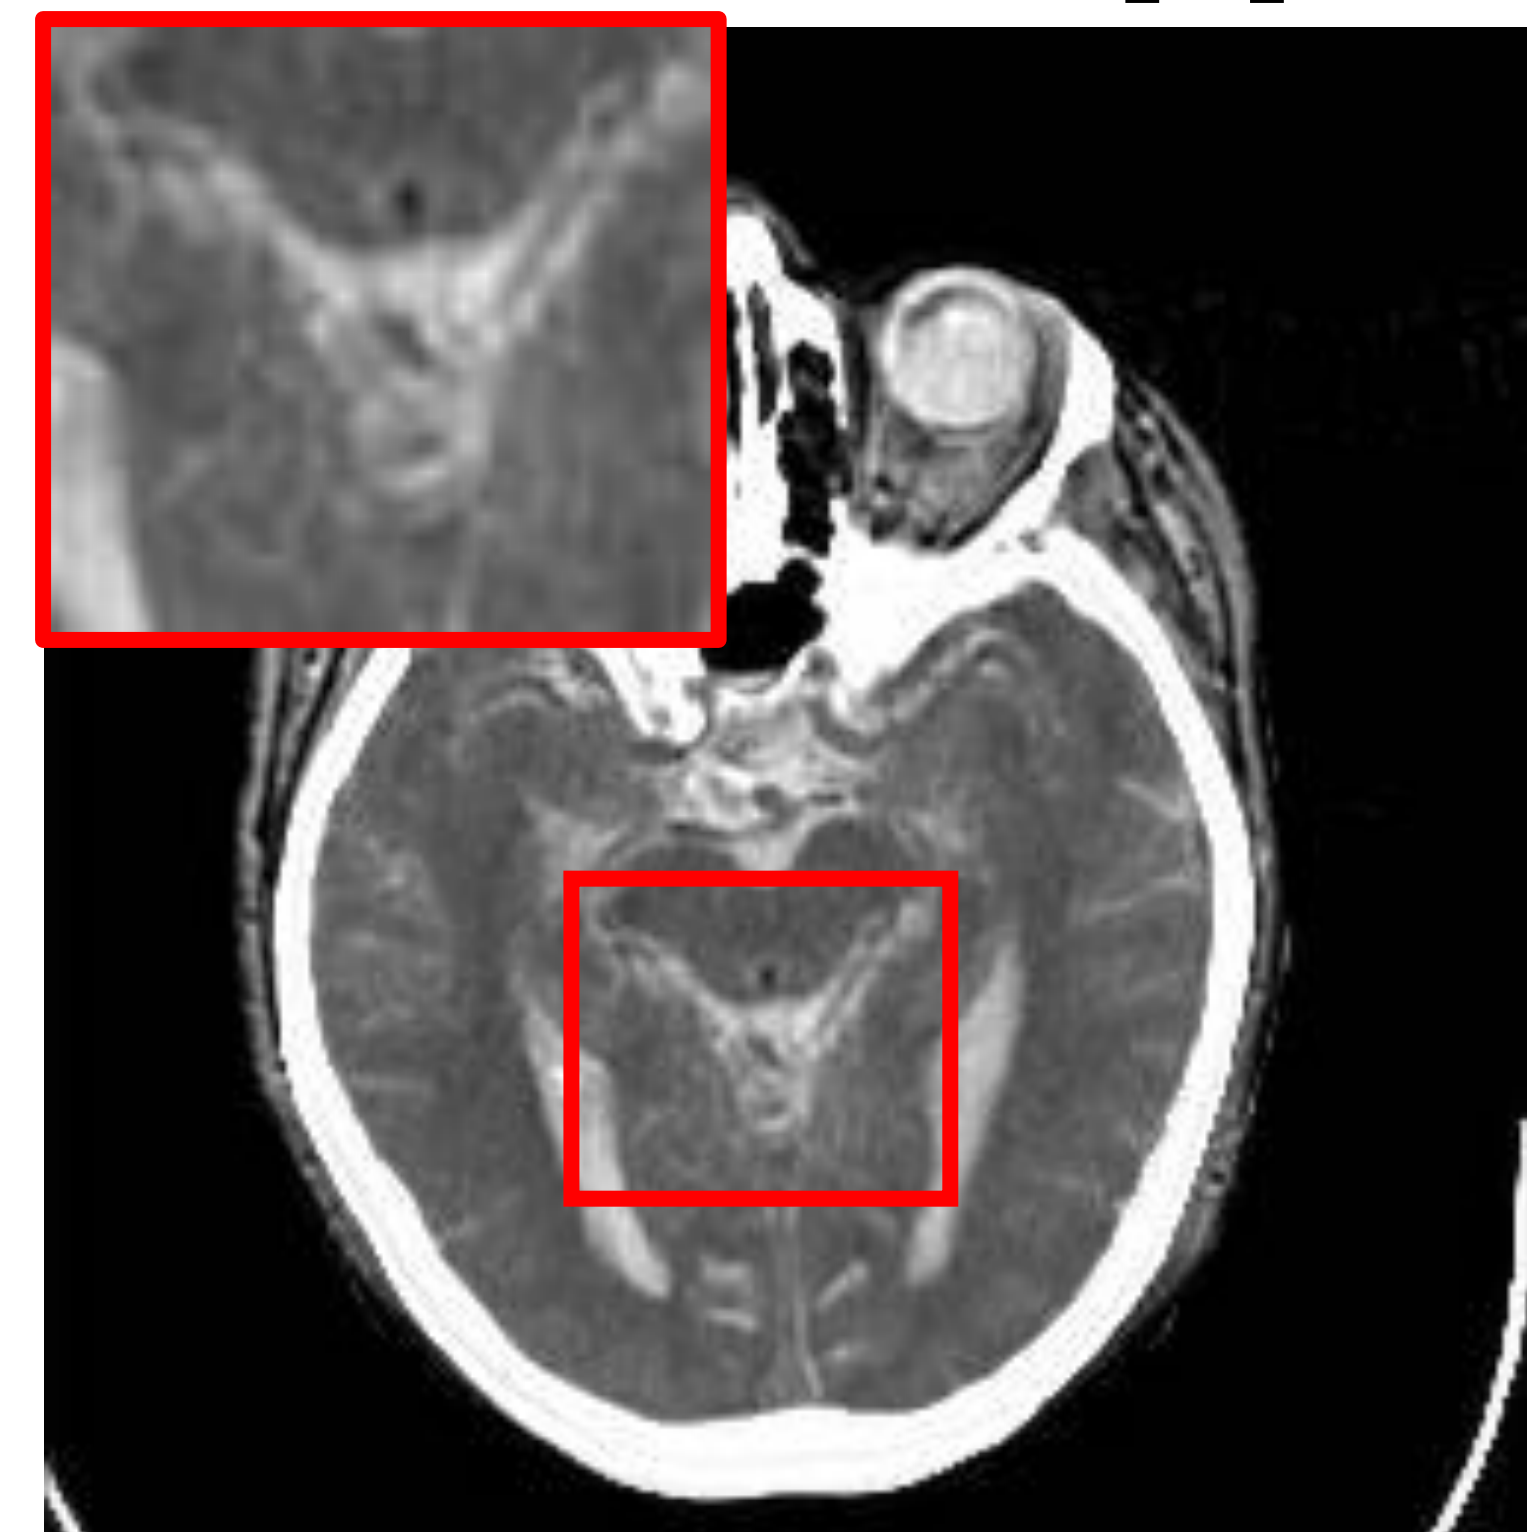

TarDAL [1]

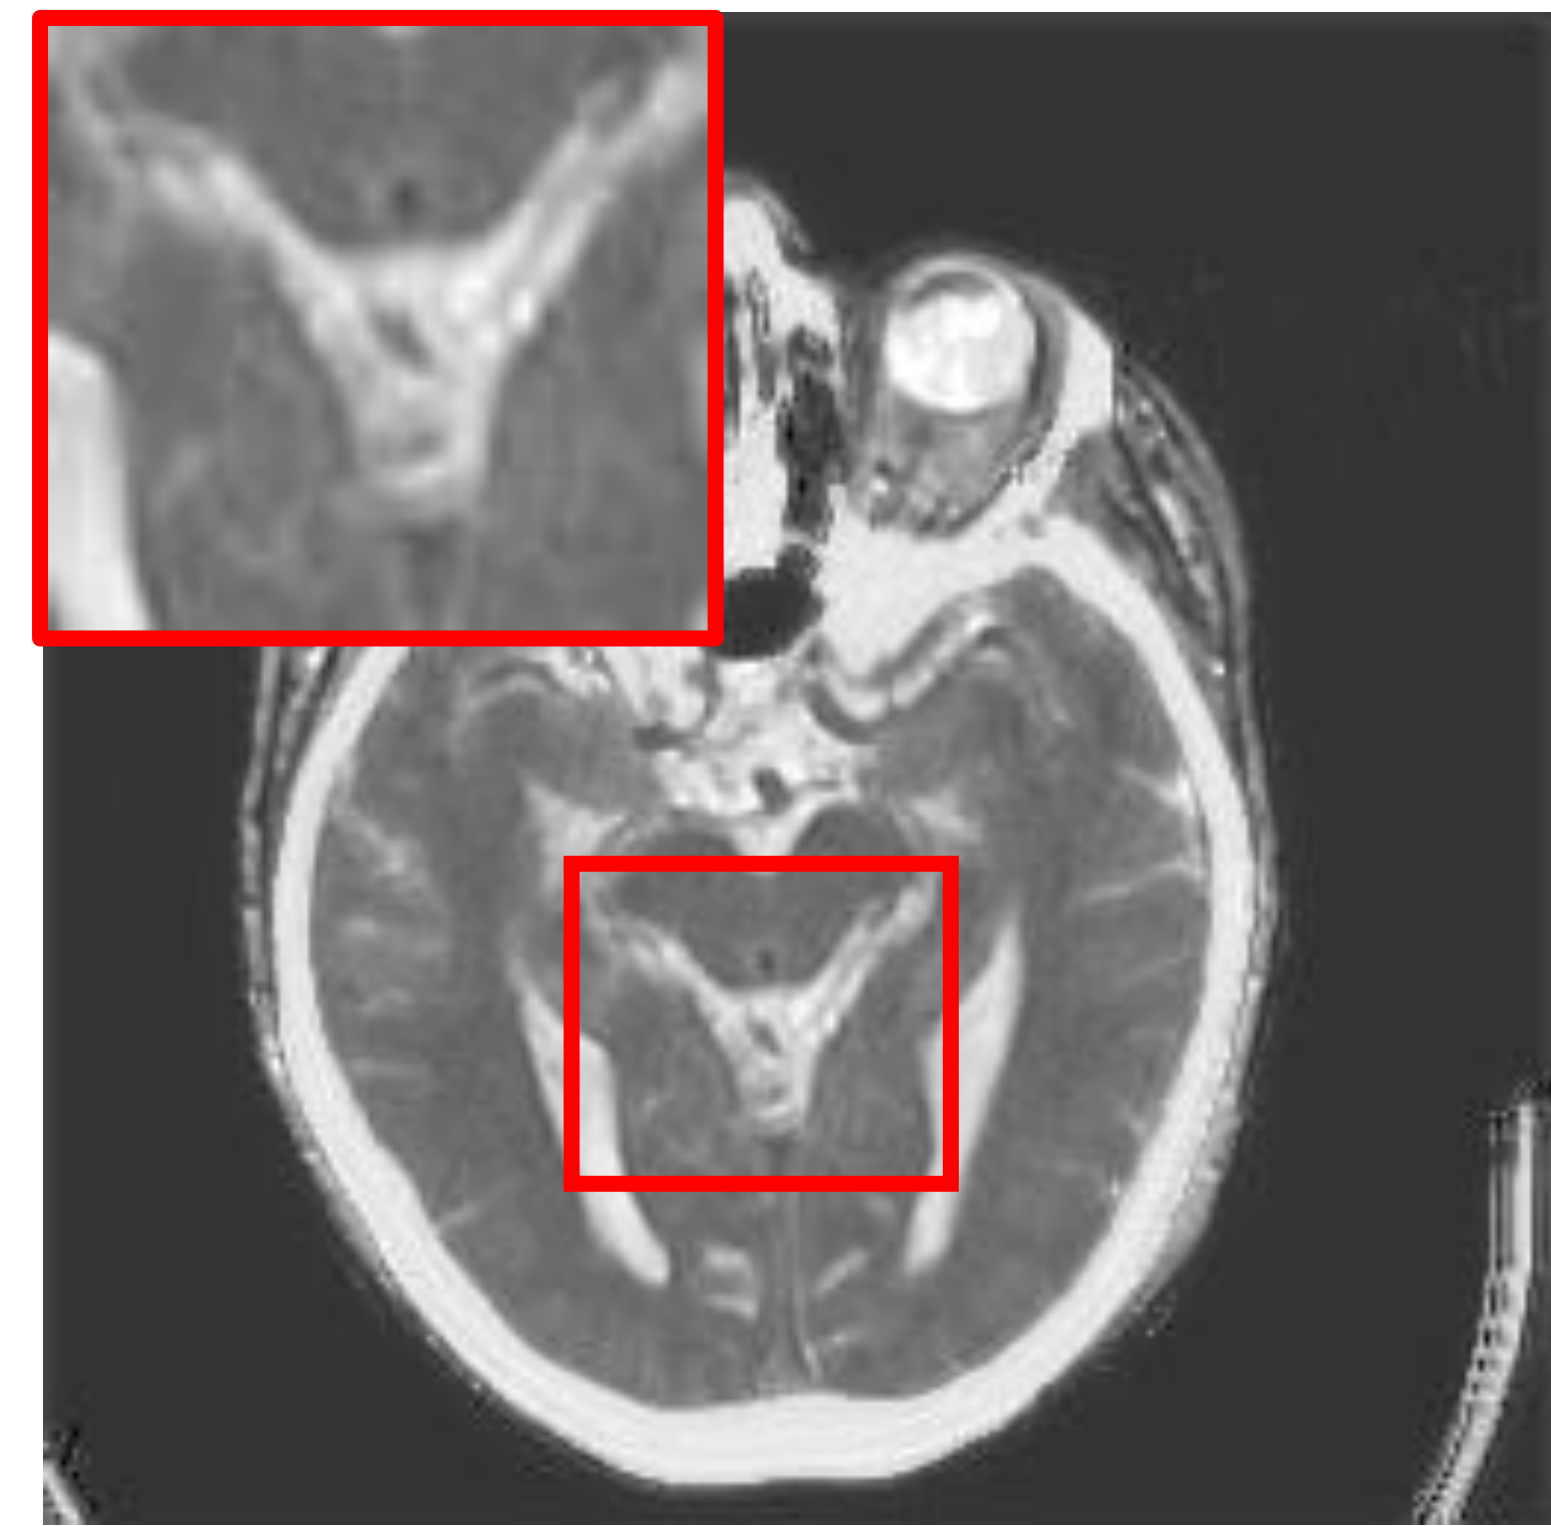

CDDFuse [7]

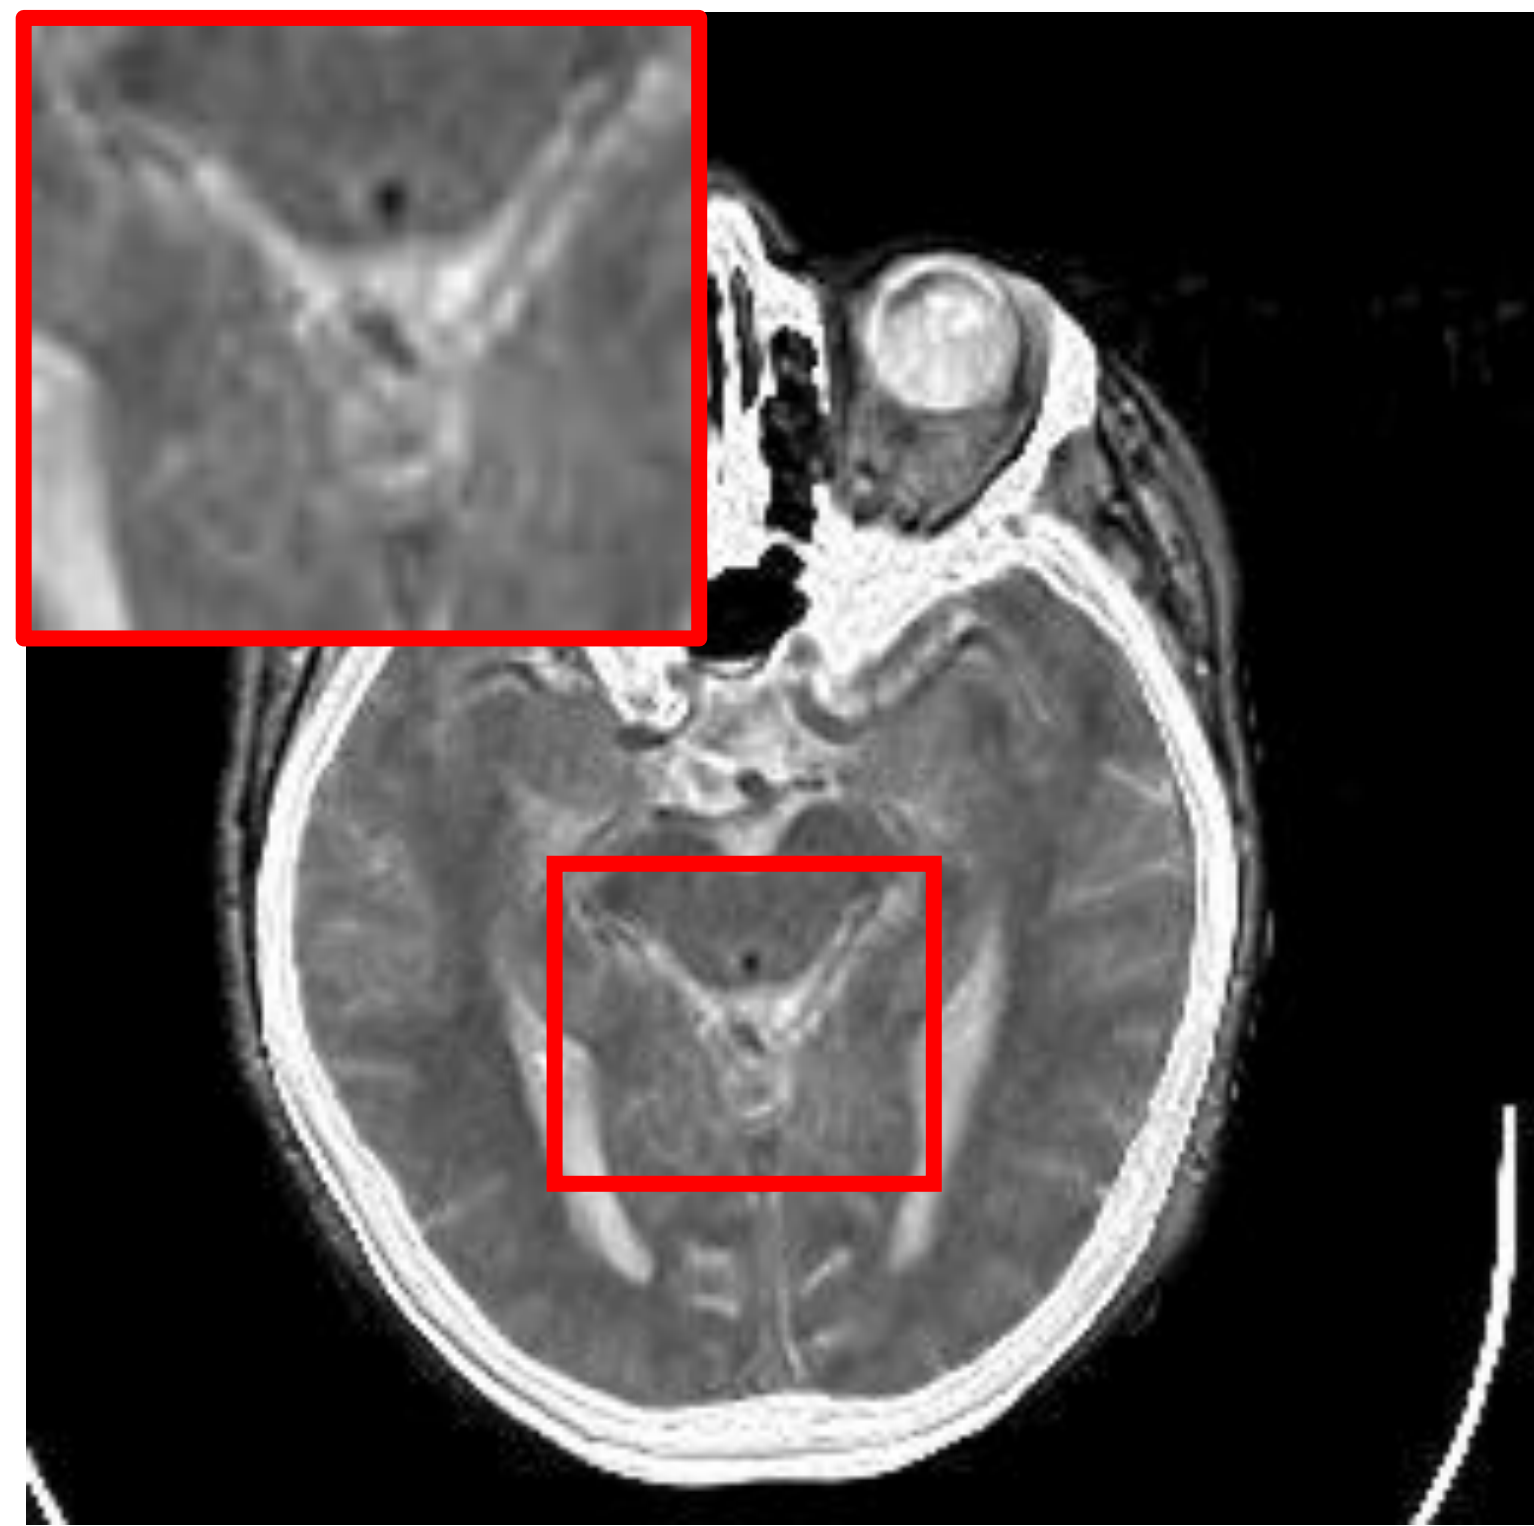

DDFM [8]

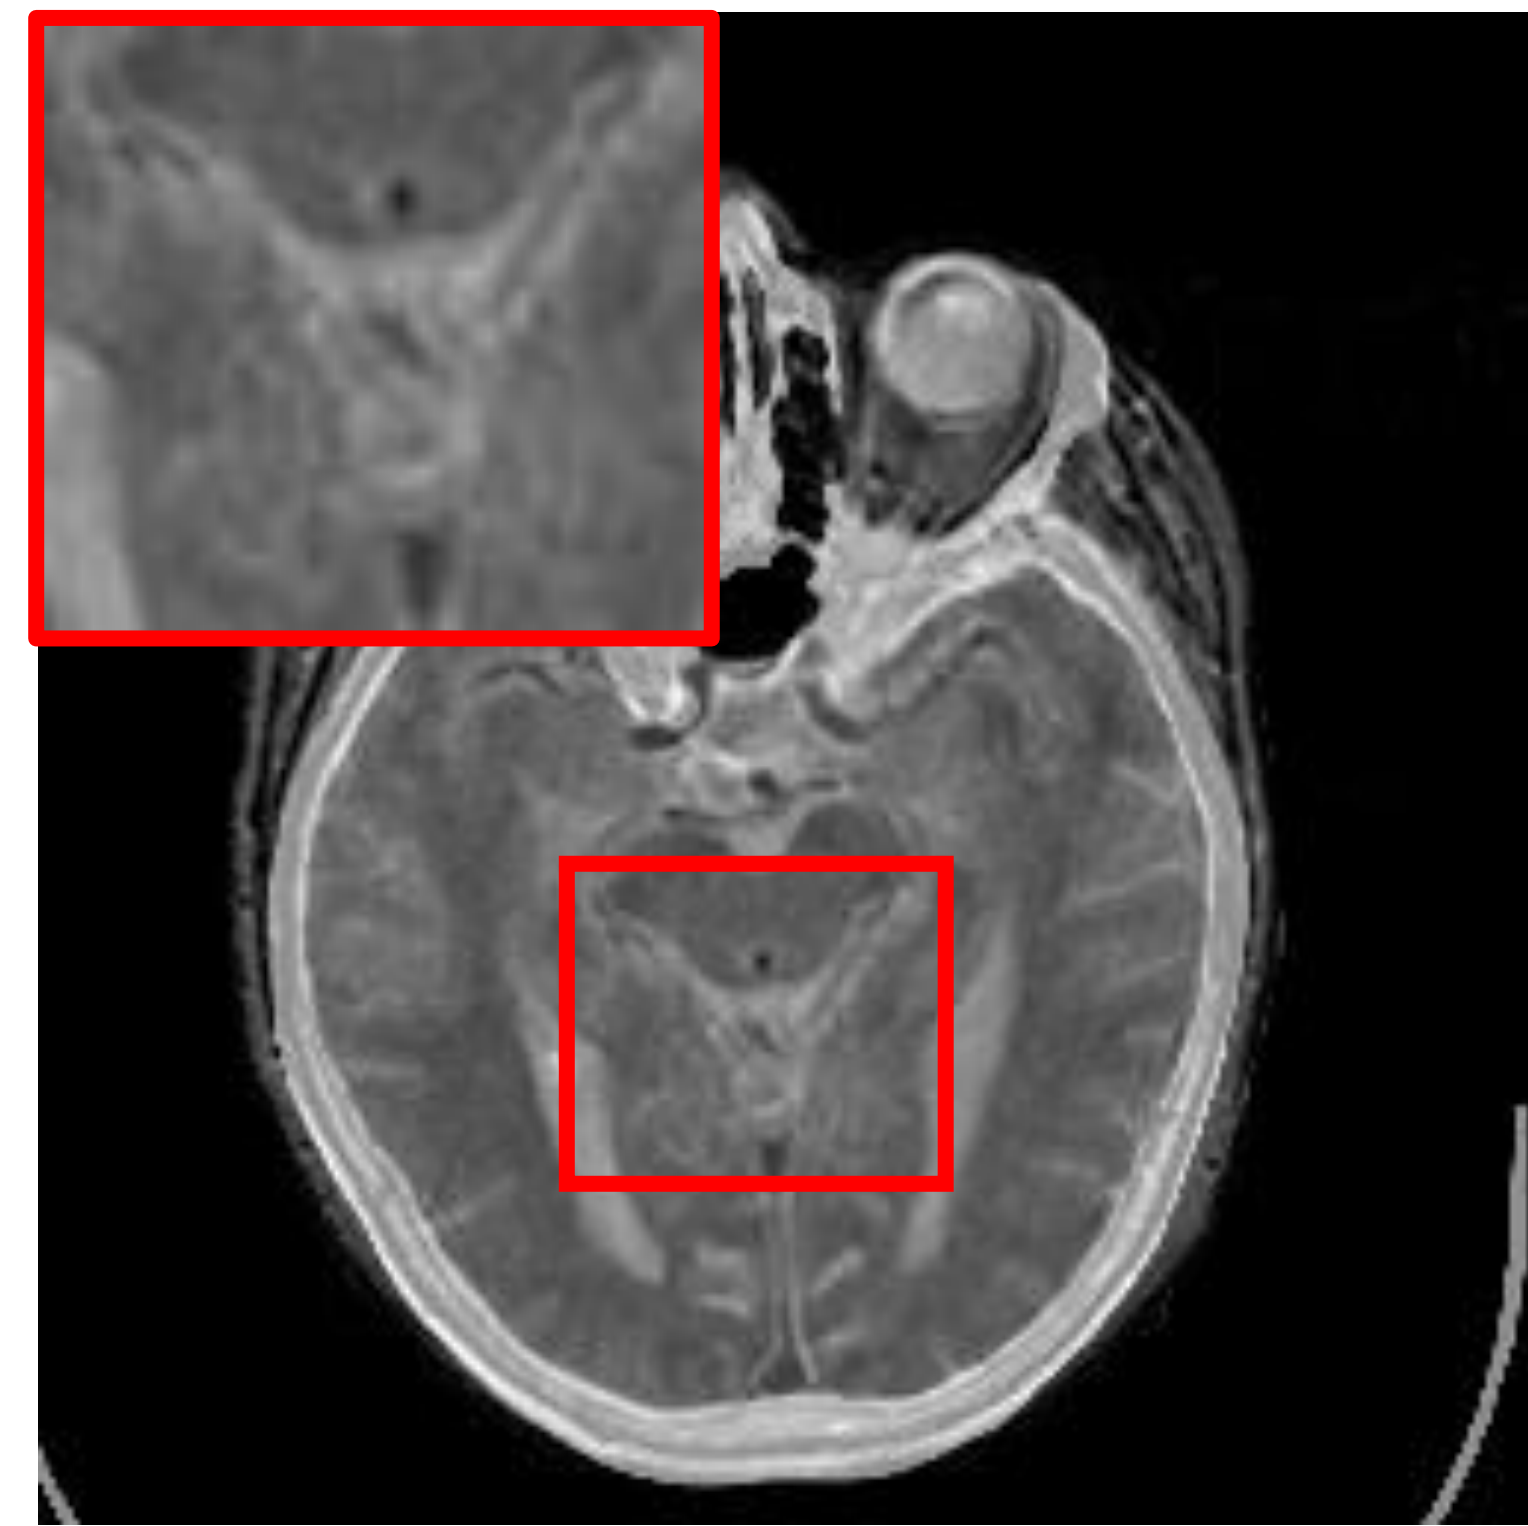

Dif-Fusion [5]

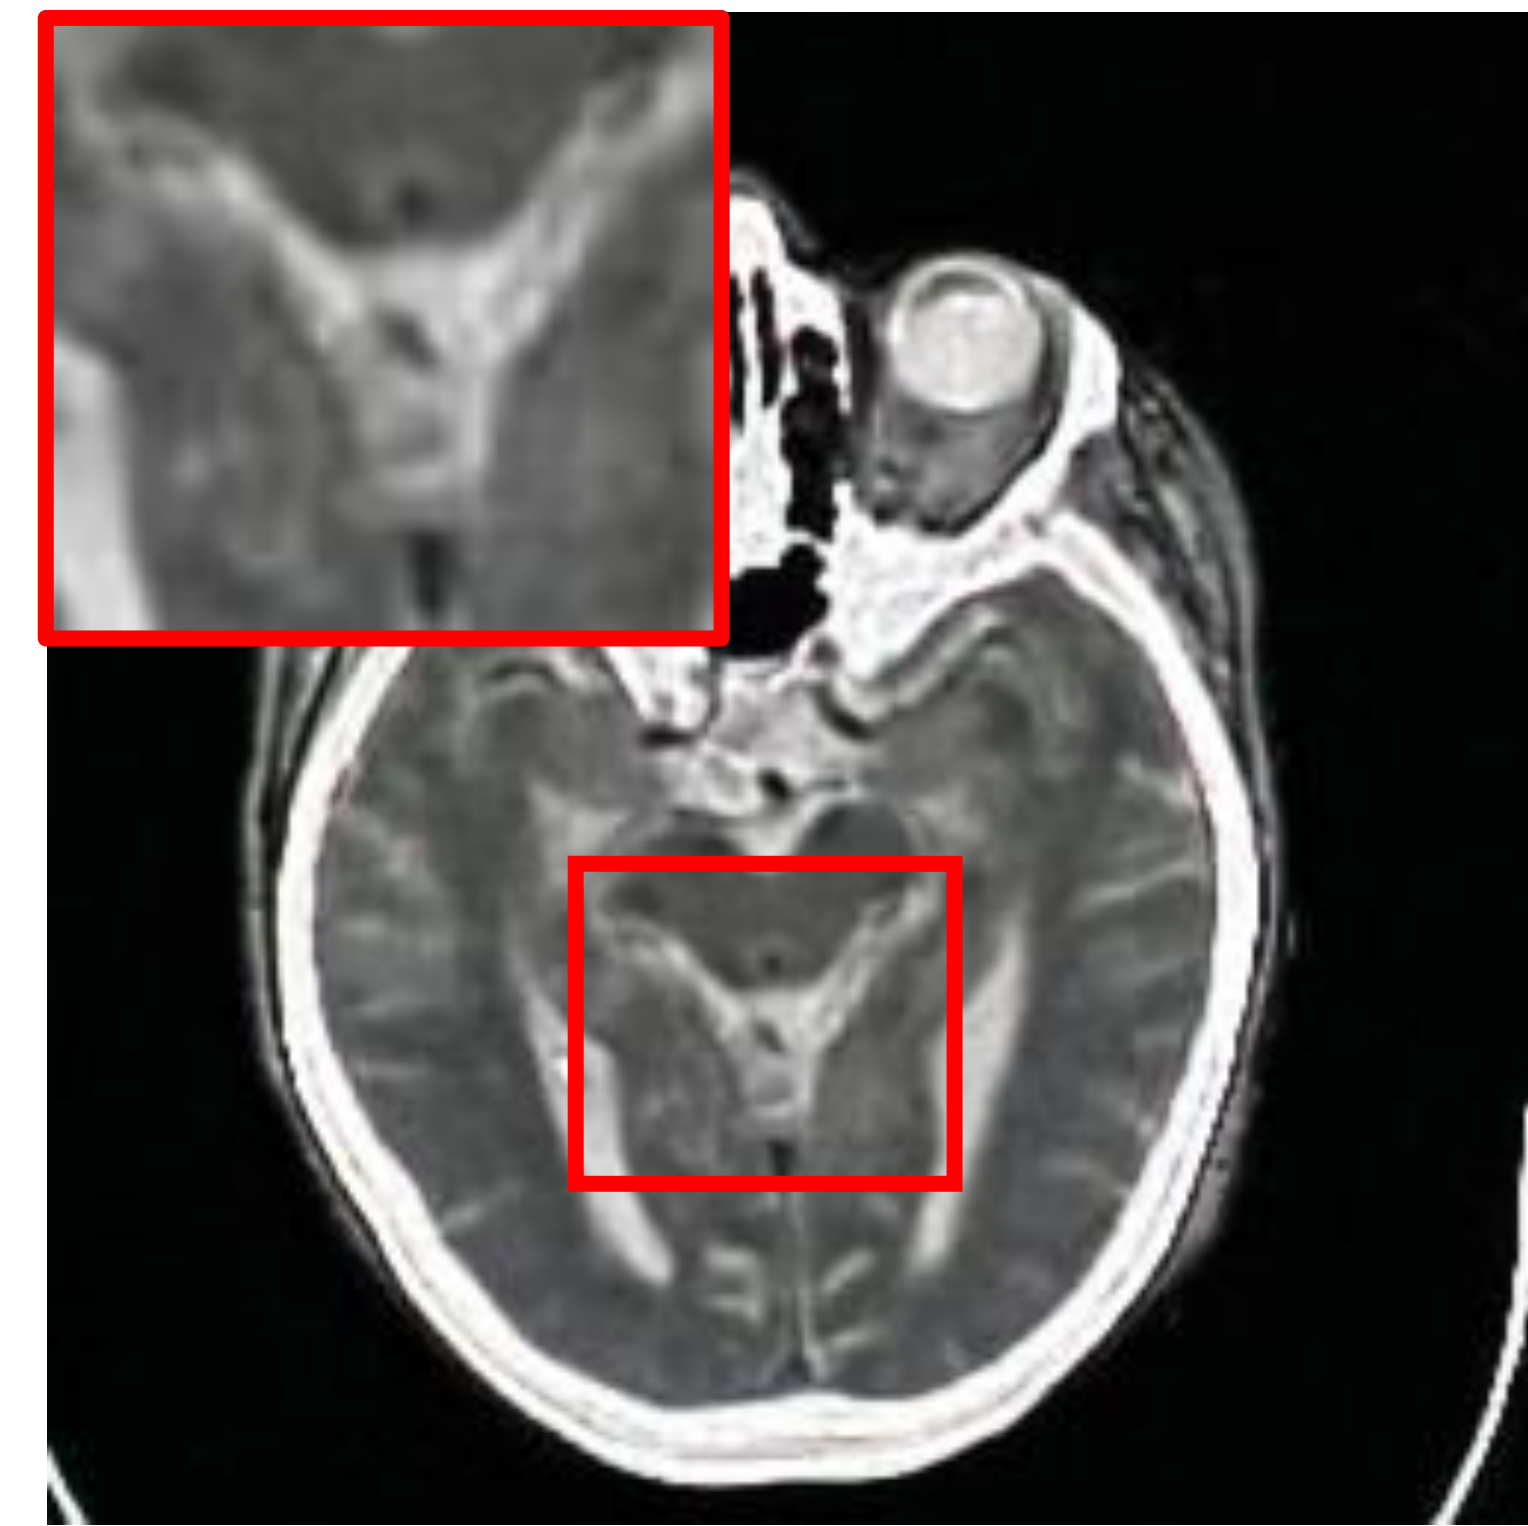**DCAFuse (Ours)**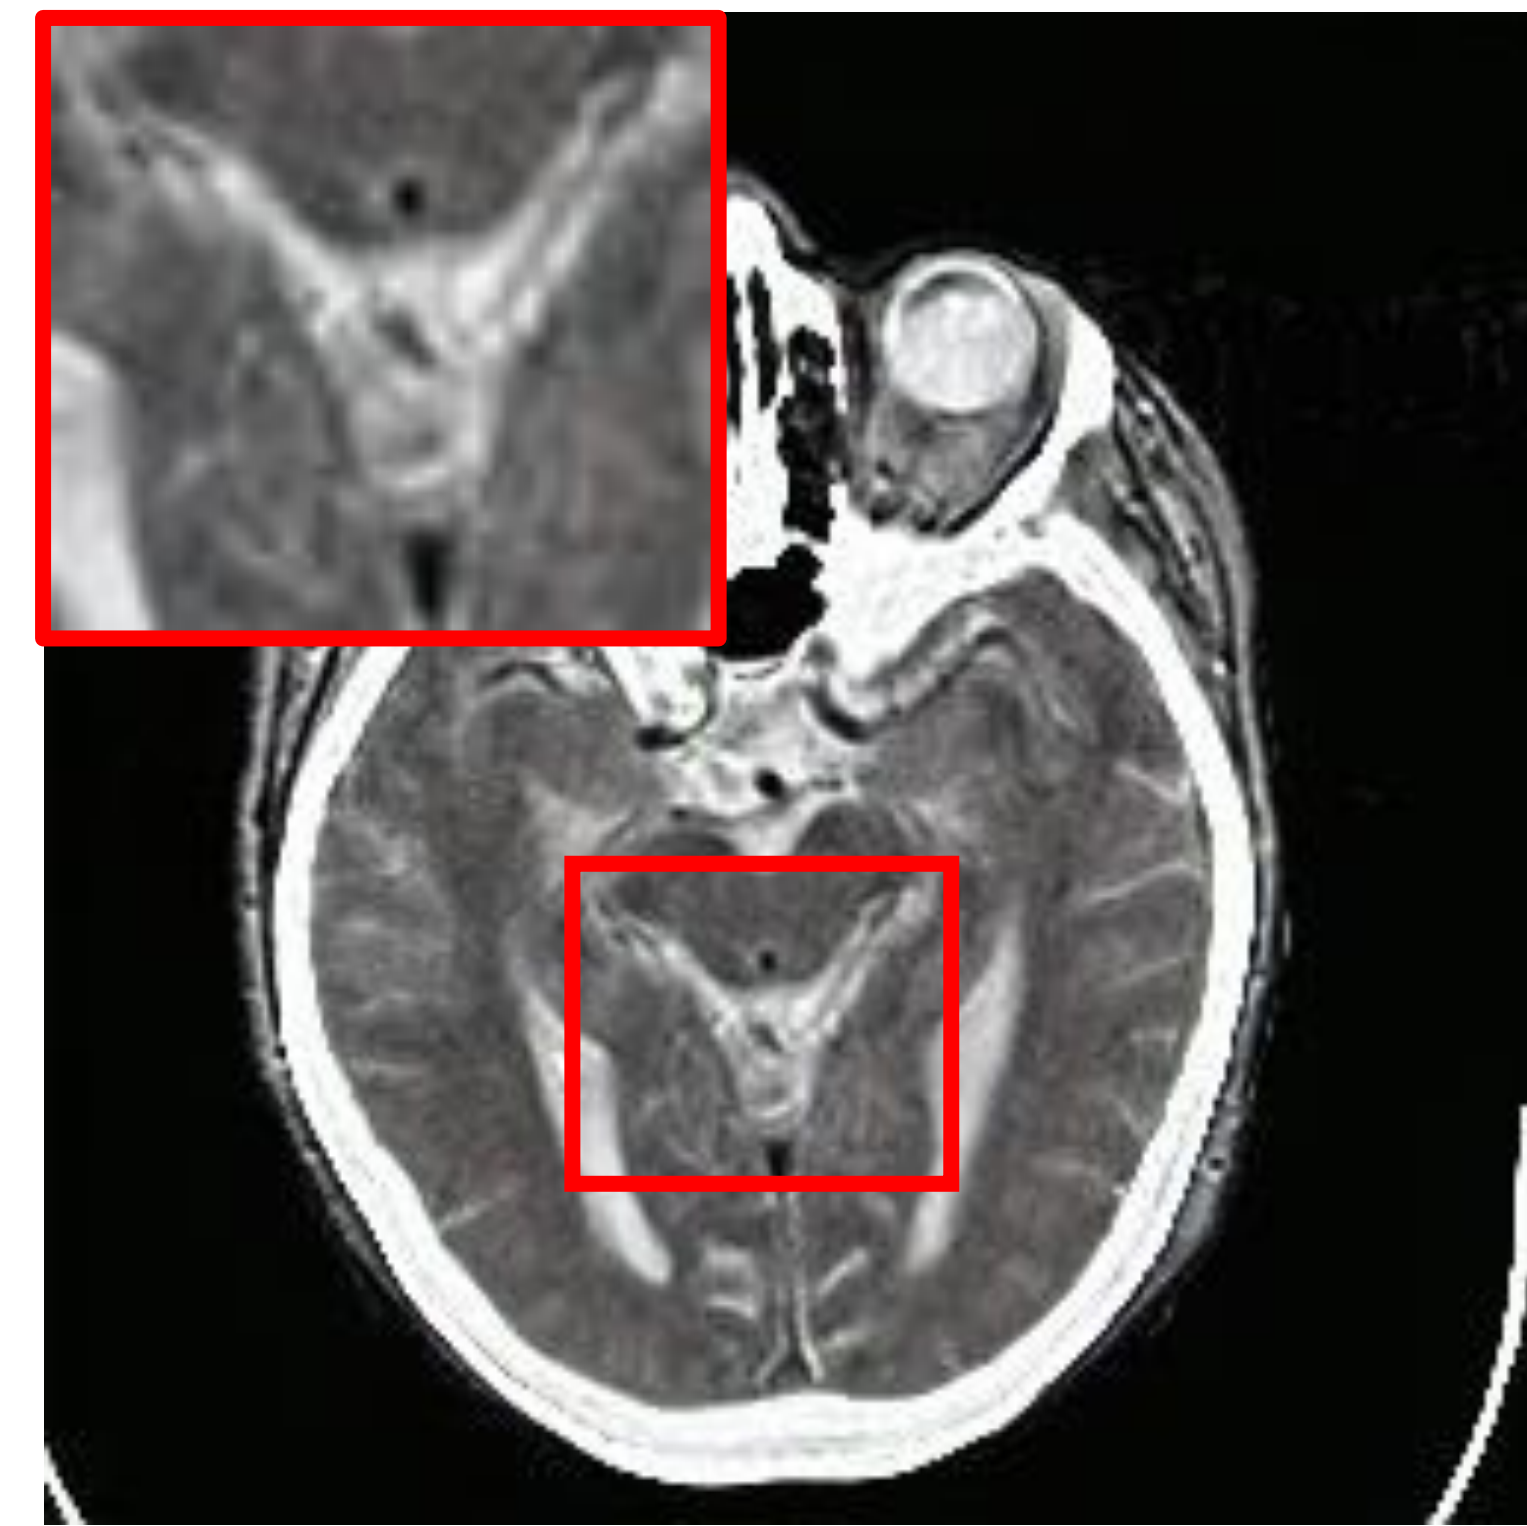

Supplement: supplementary_material [file attachment]

MRI

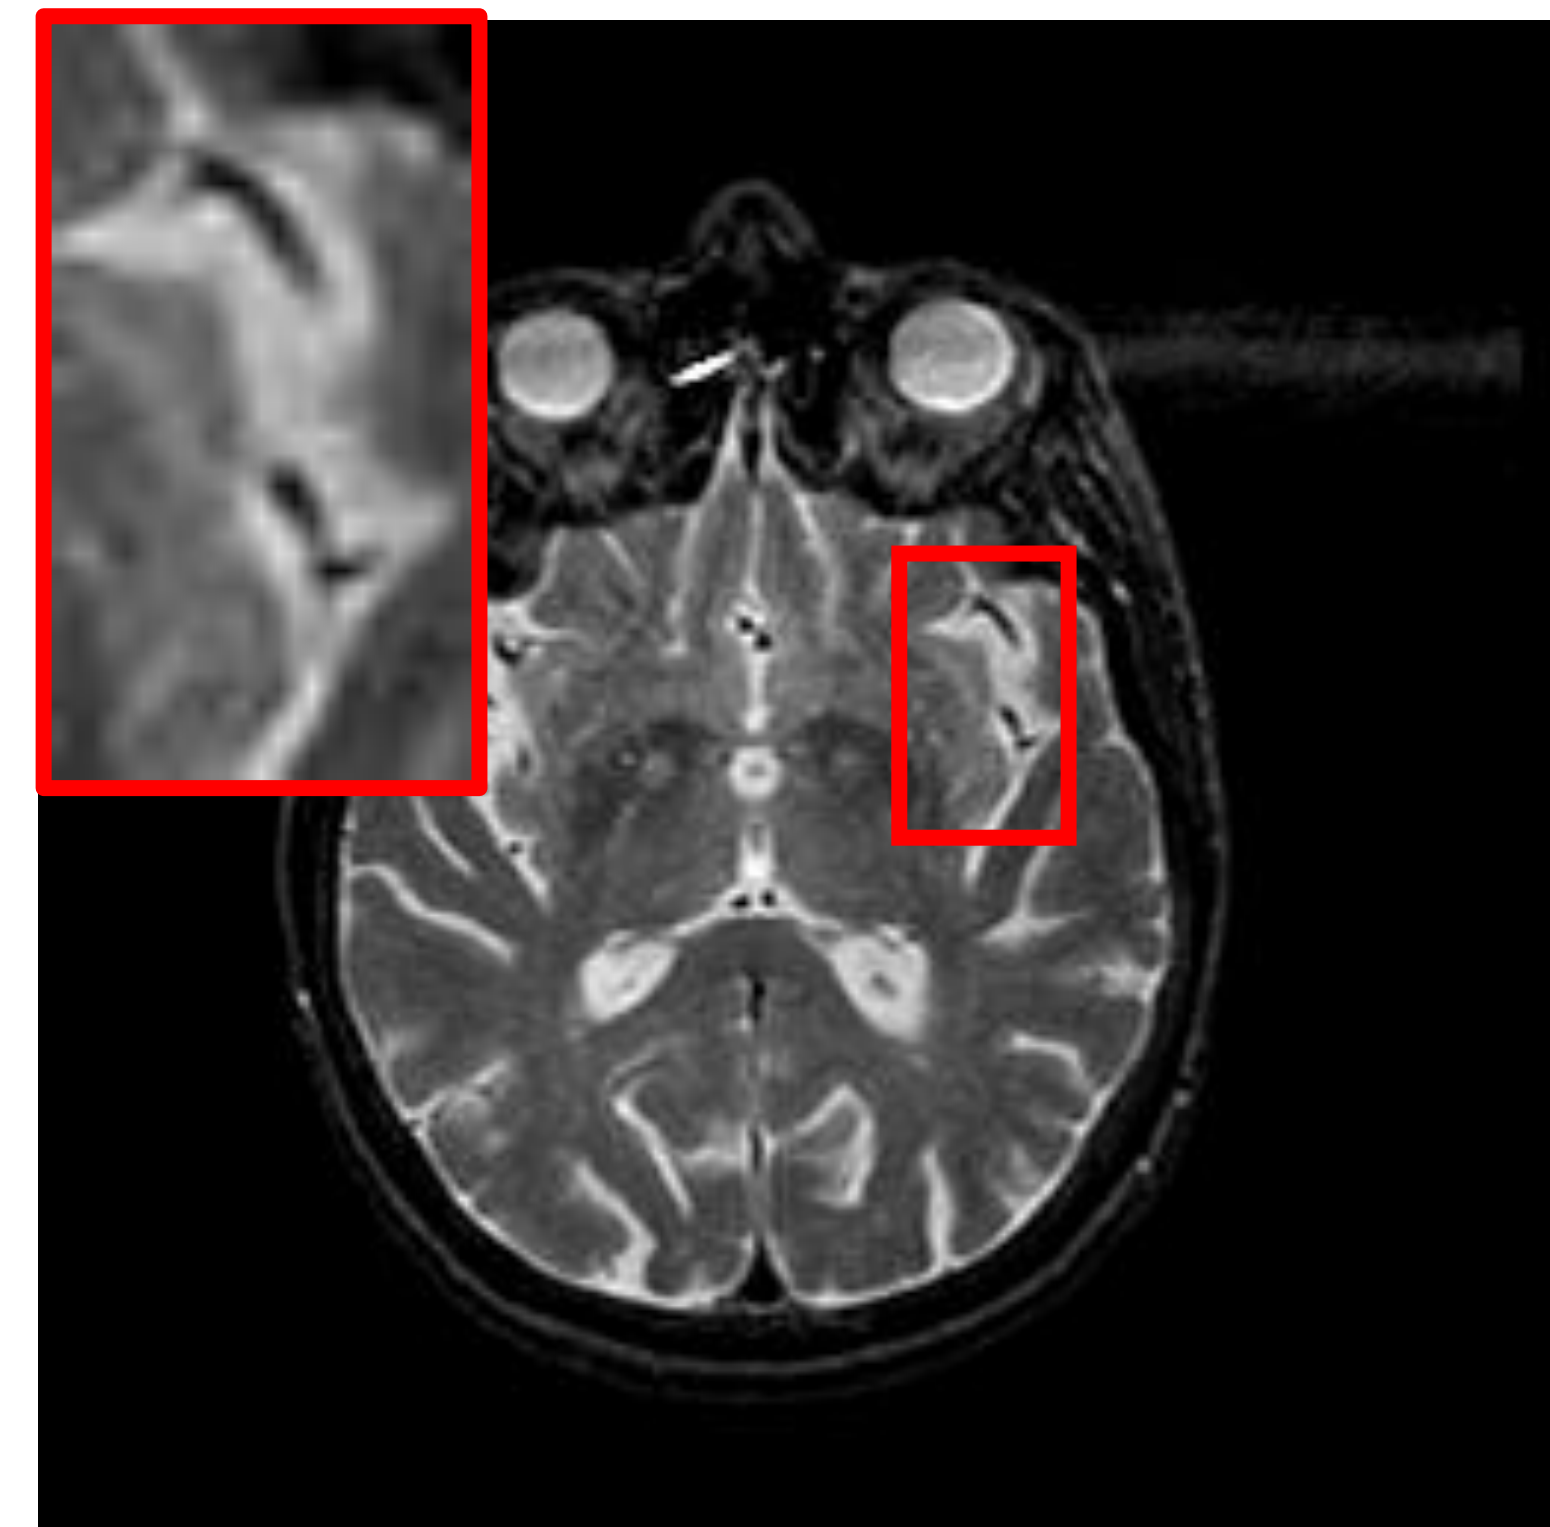

SPECT

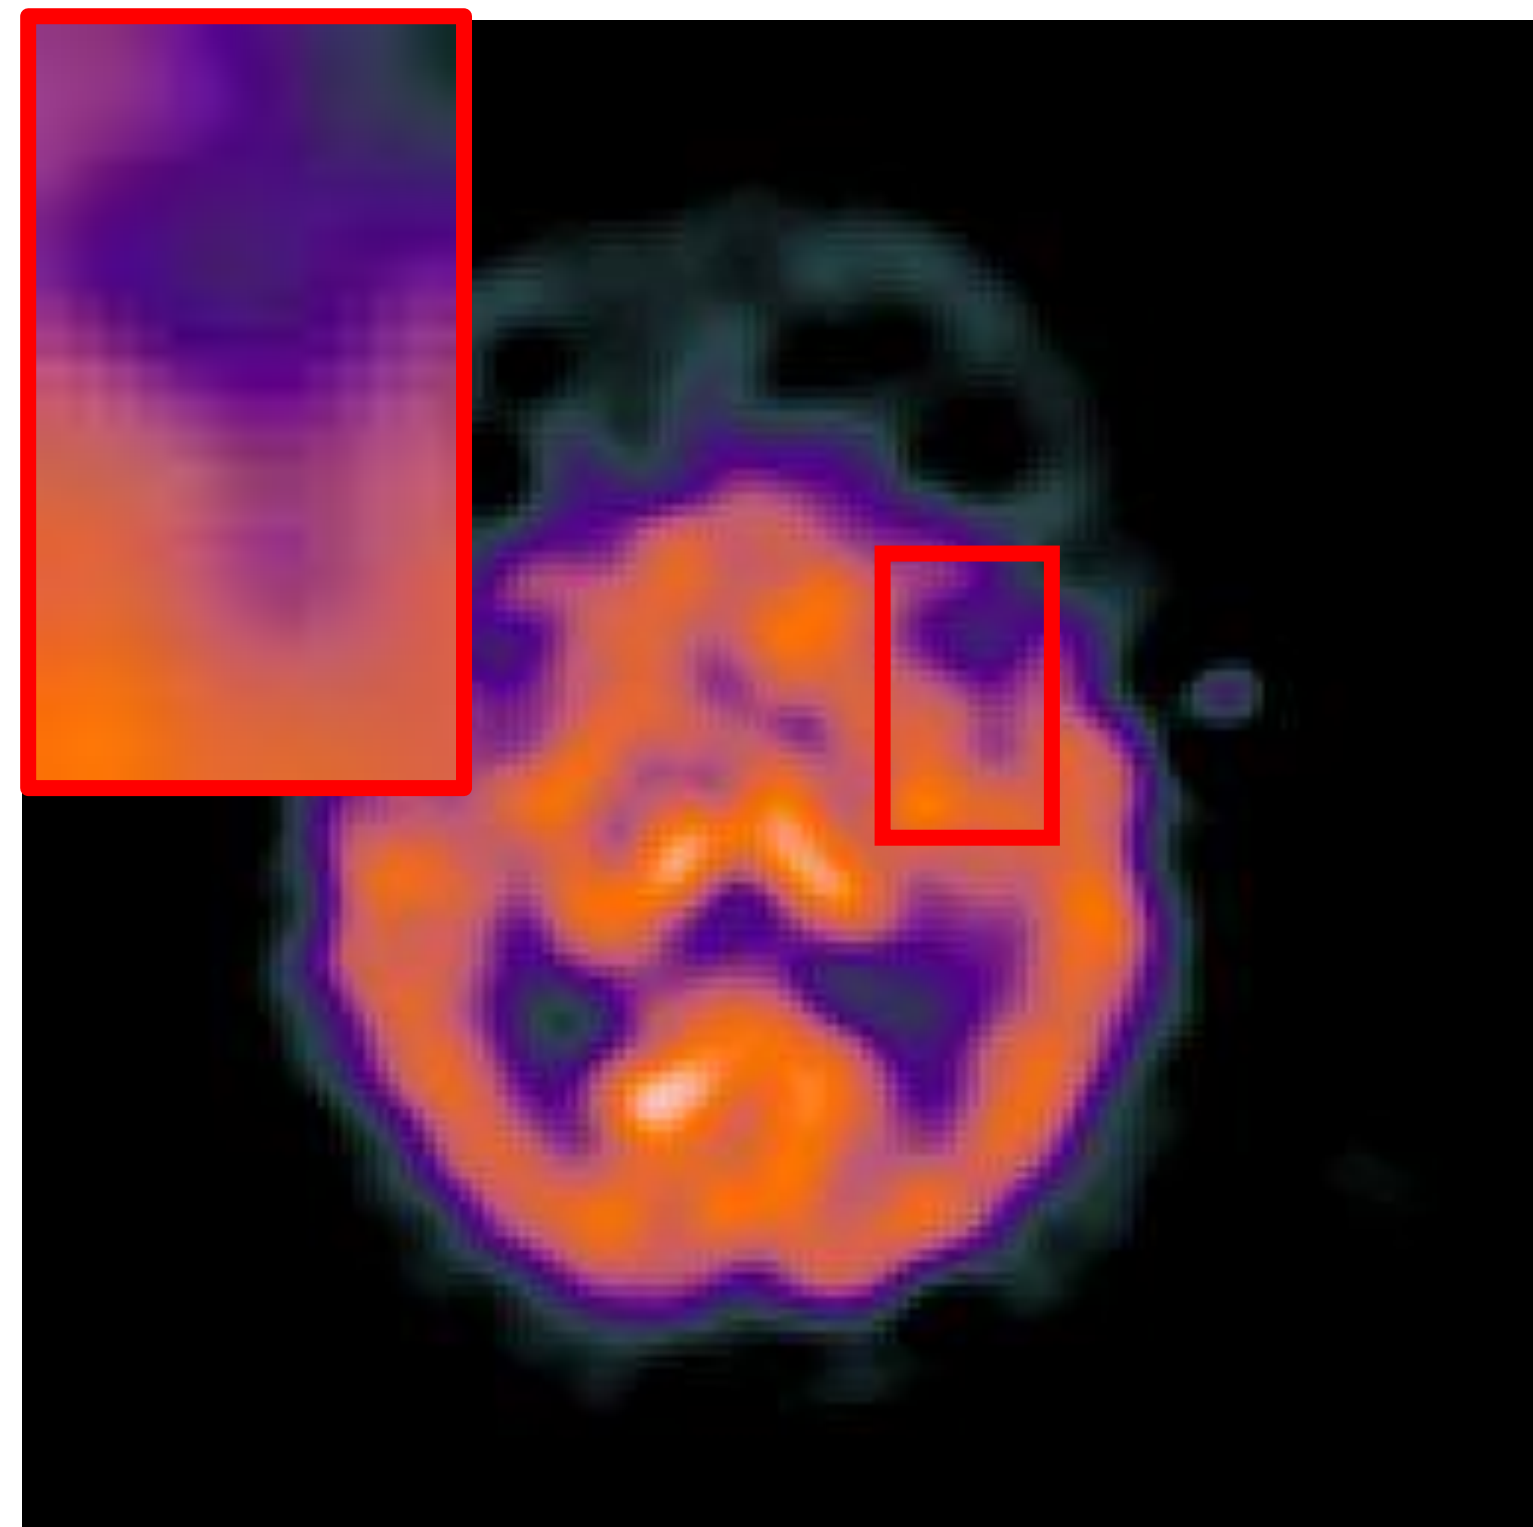

U2Fusion [4]

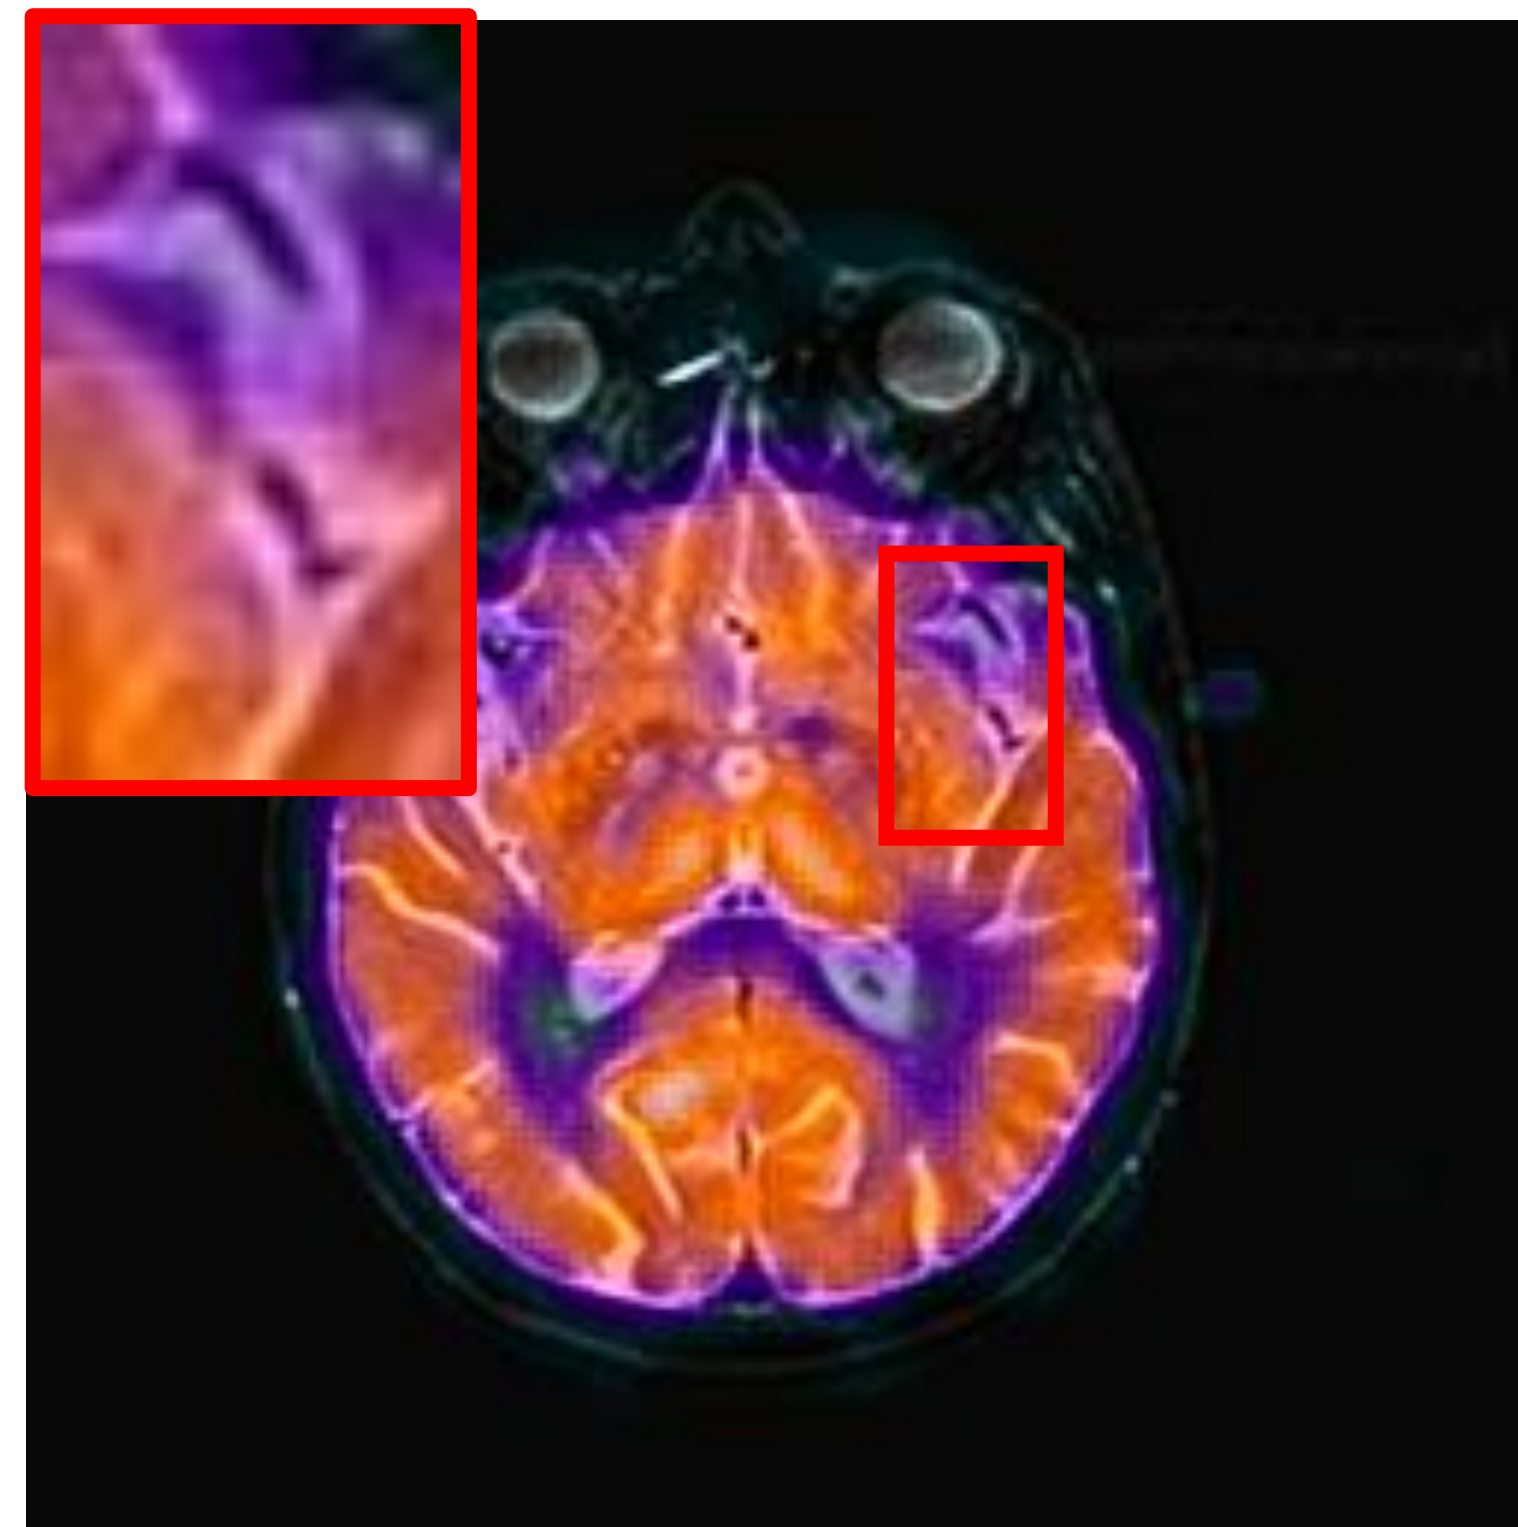

SDNet [6]

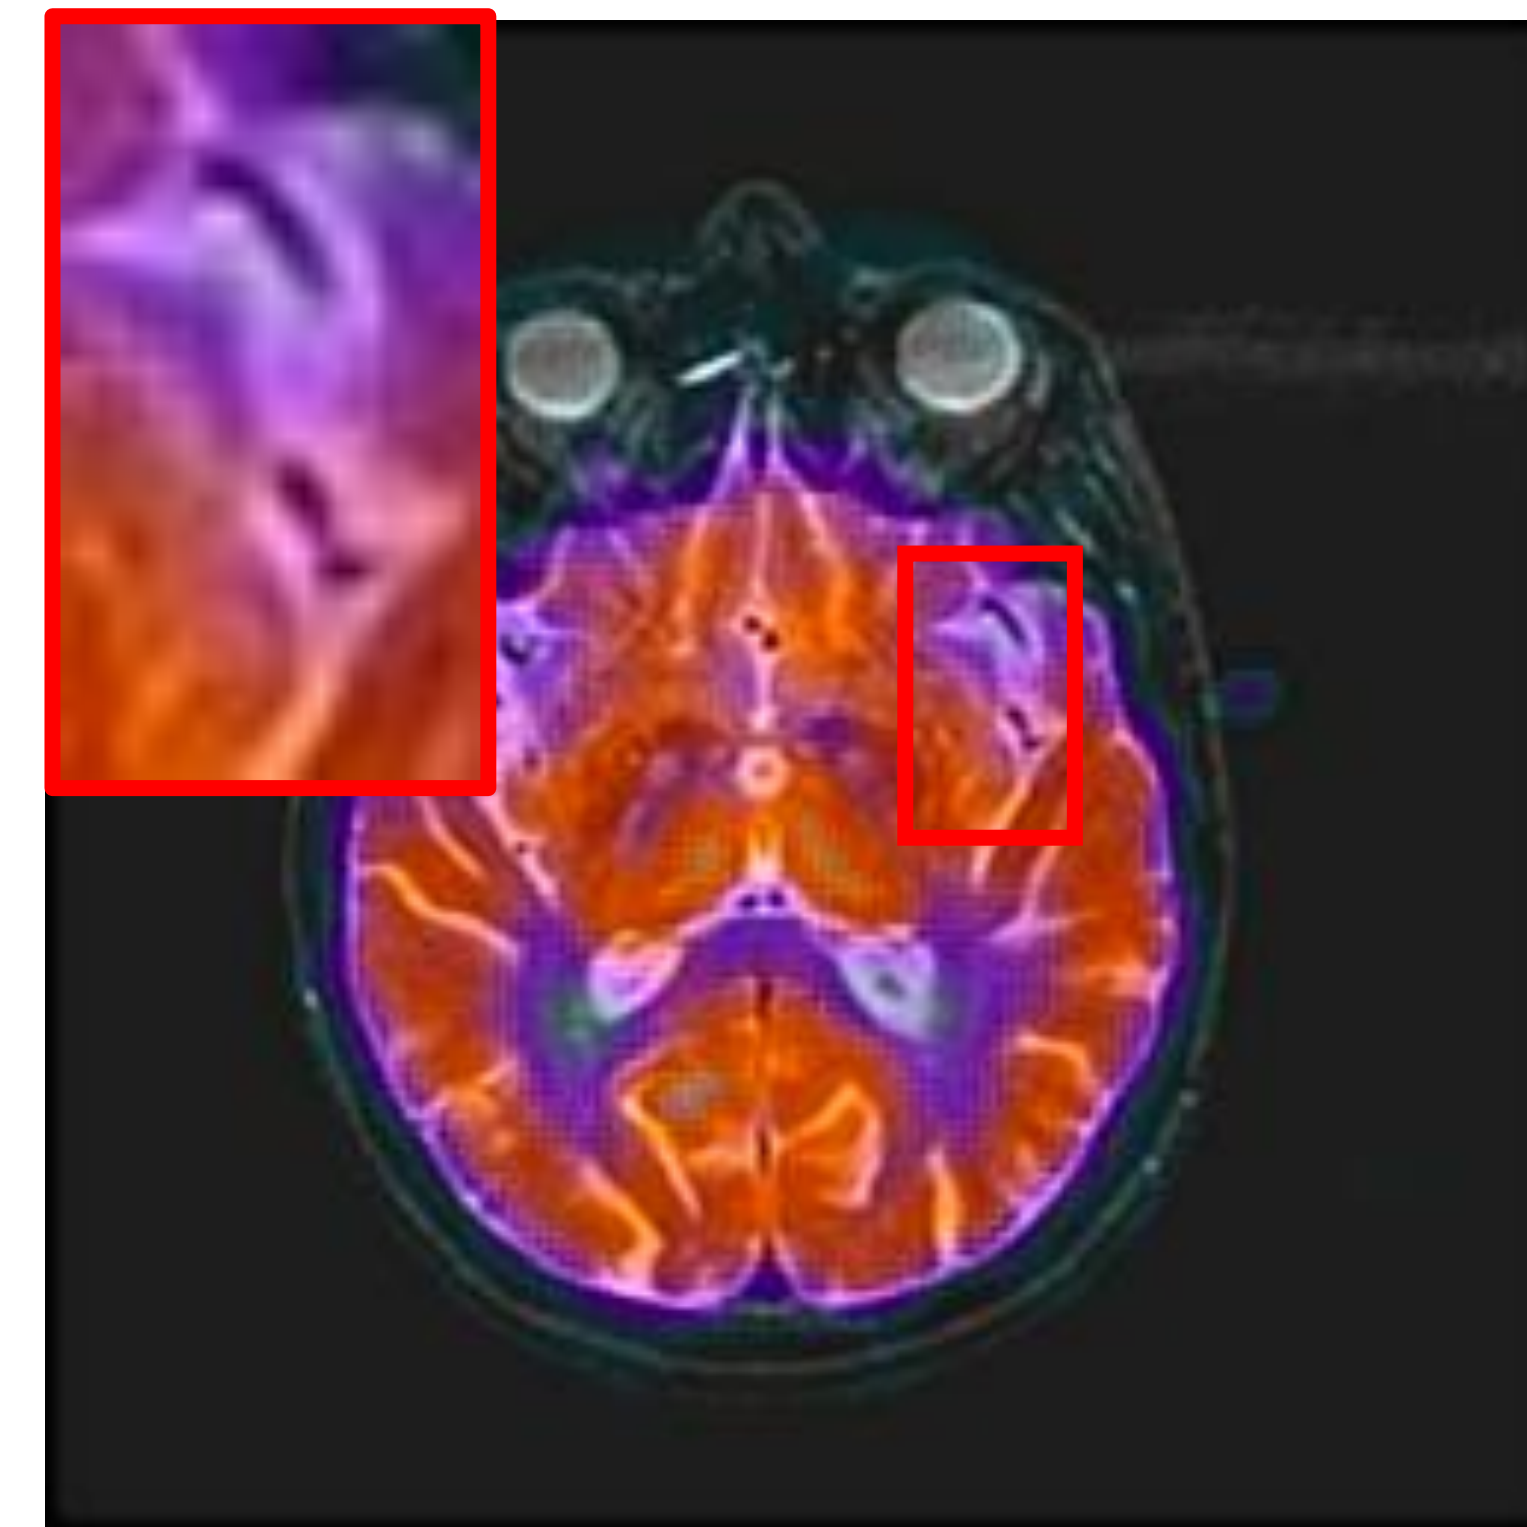

SwinFusion [2]

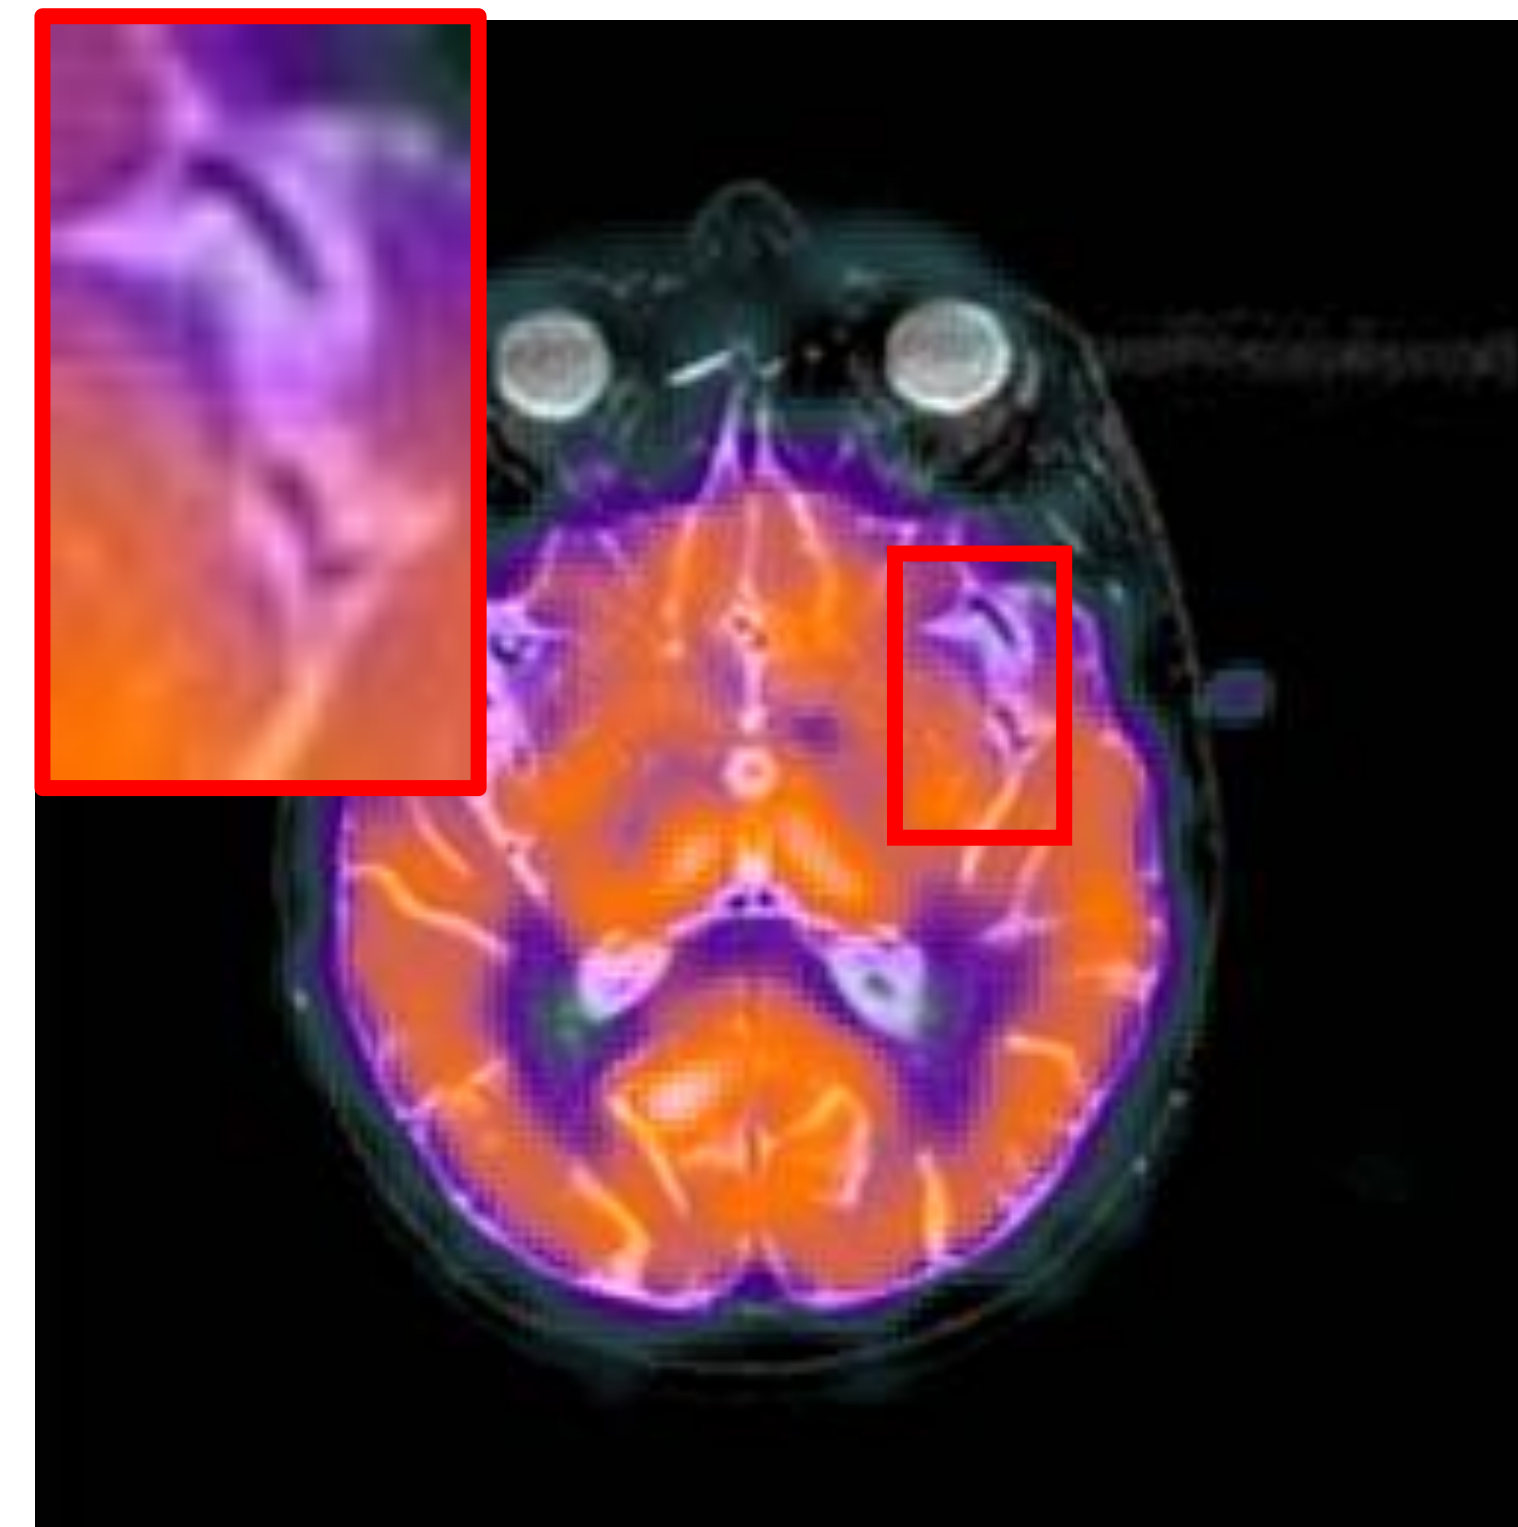

TarDAL [1]

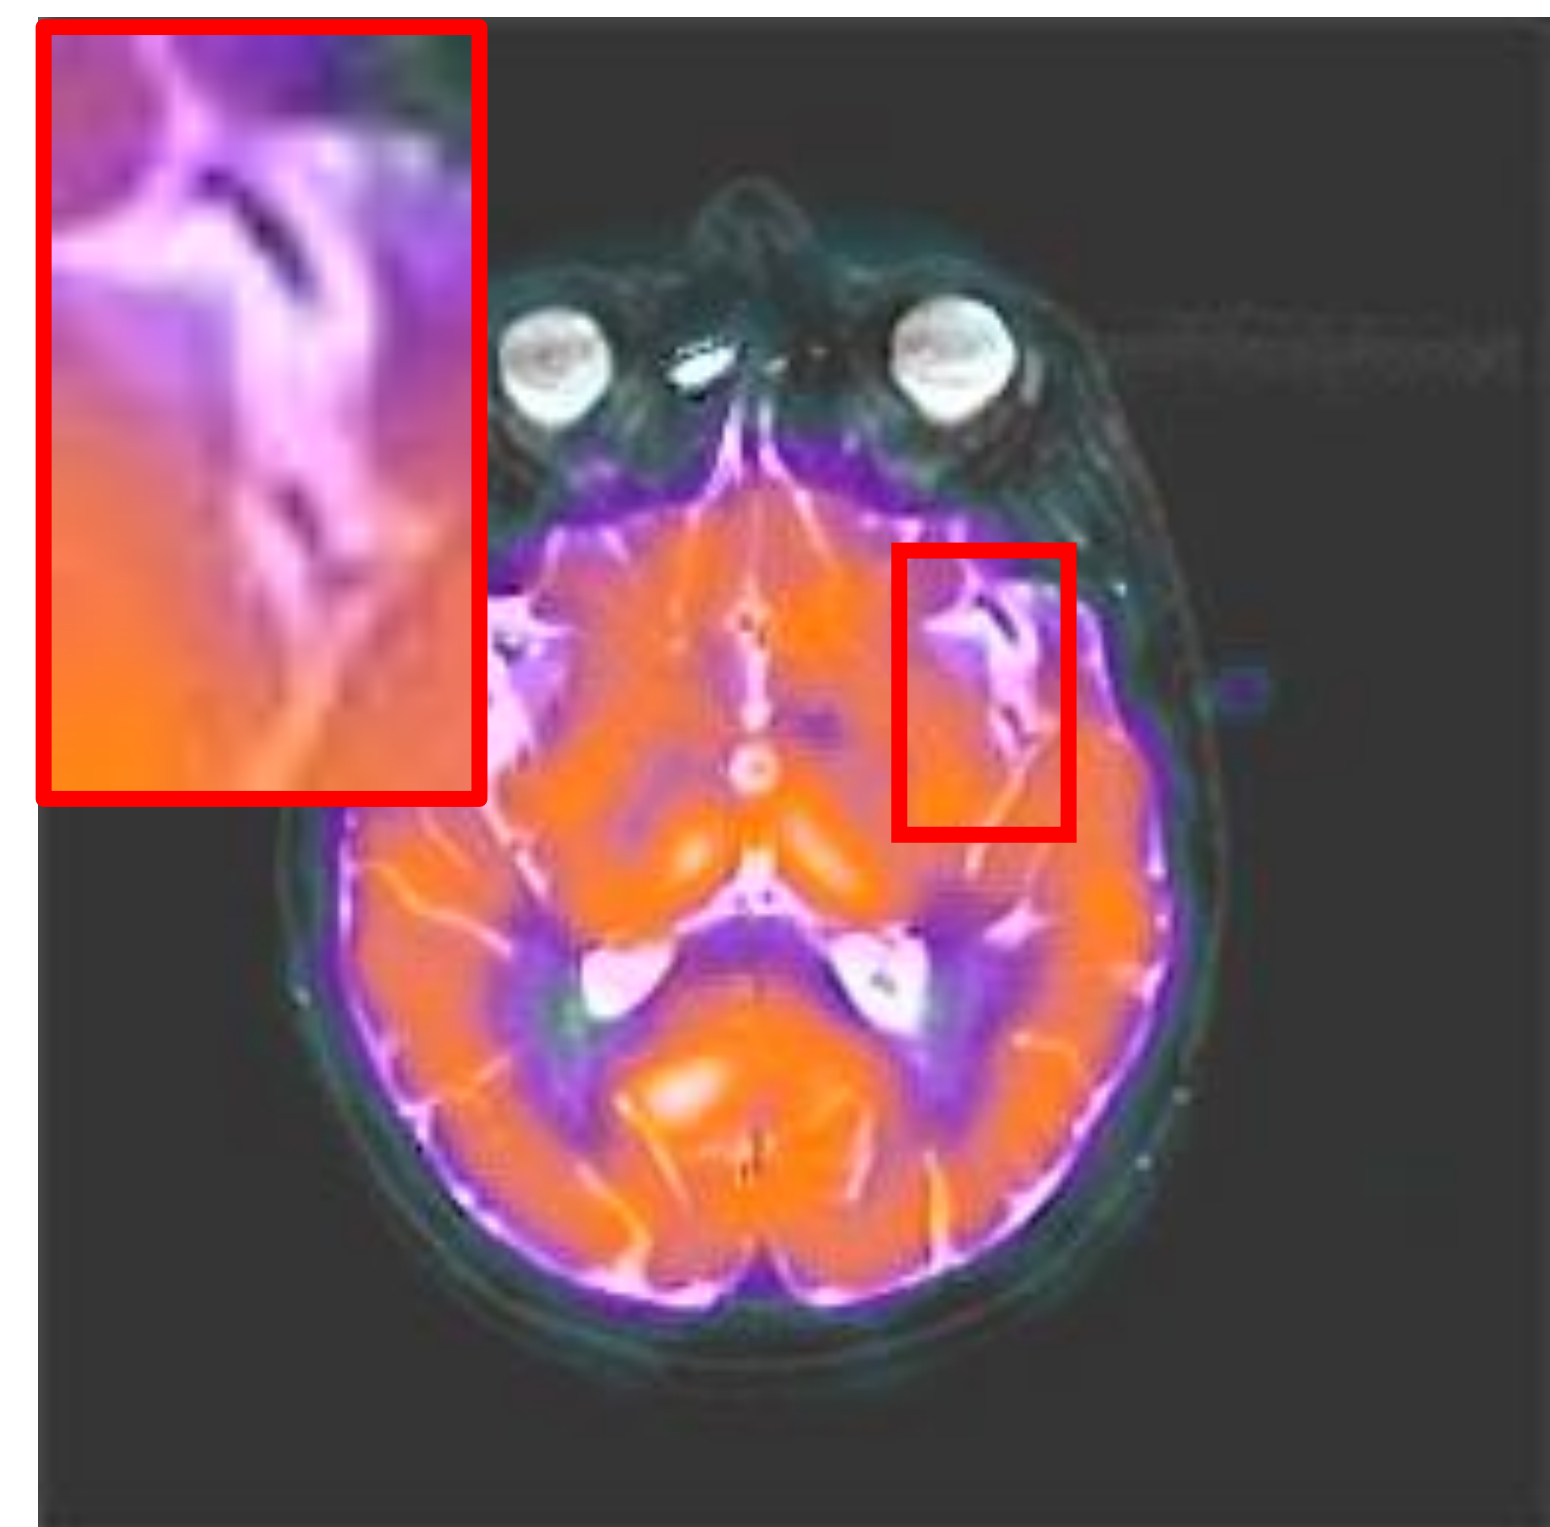

CDDFuse [7]

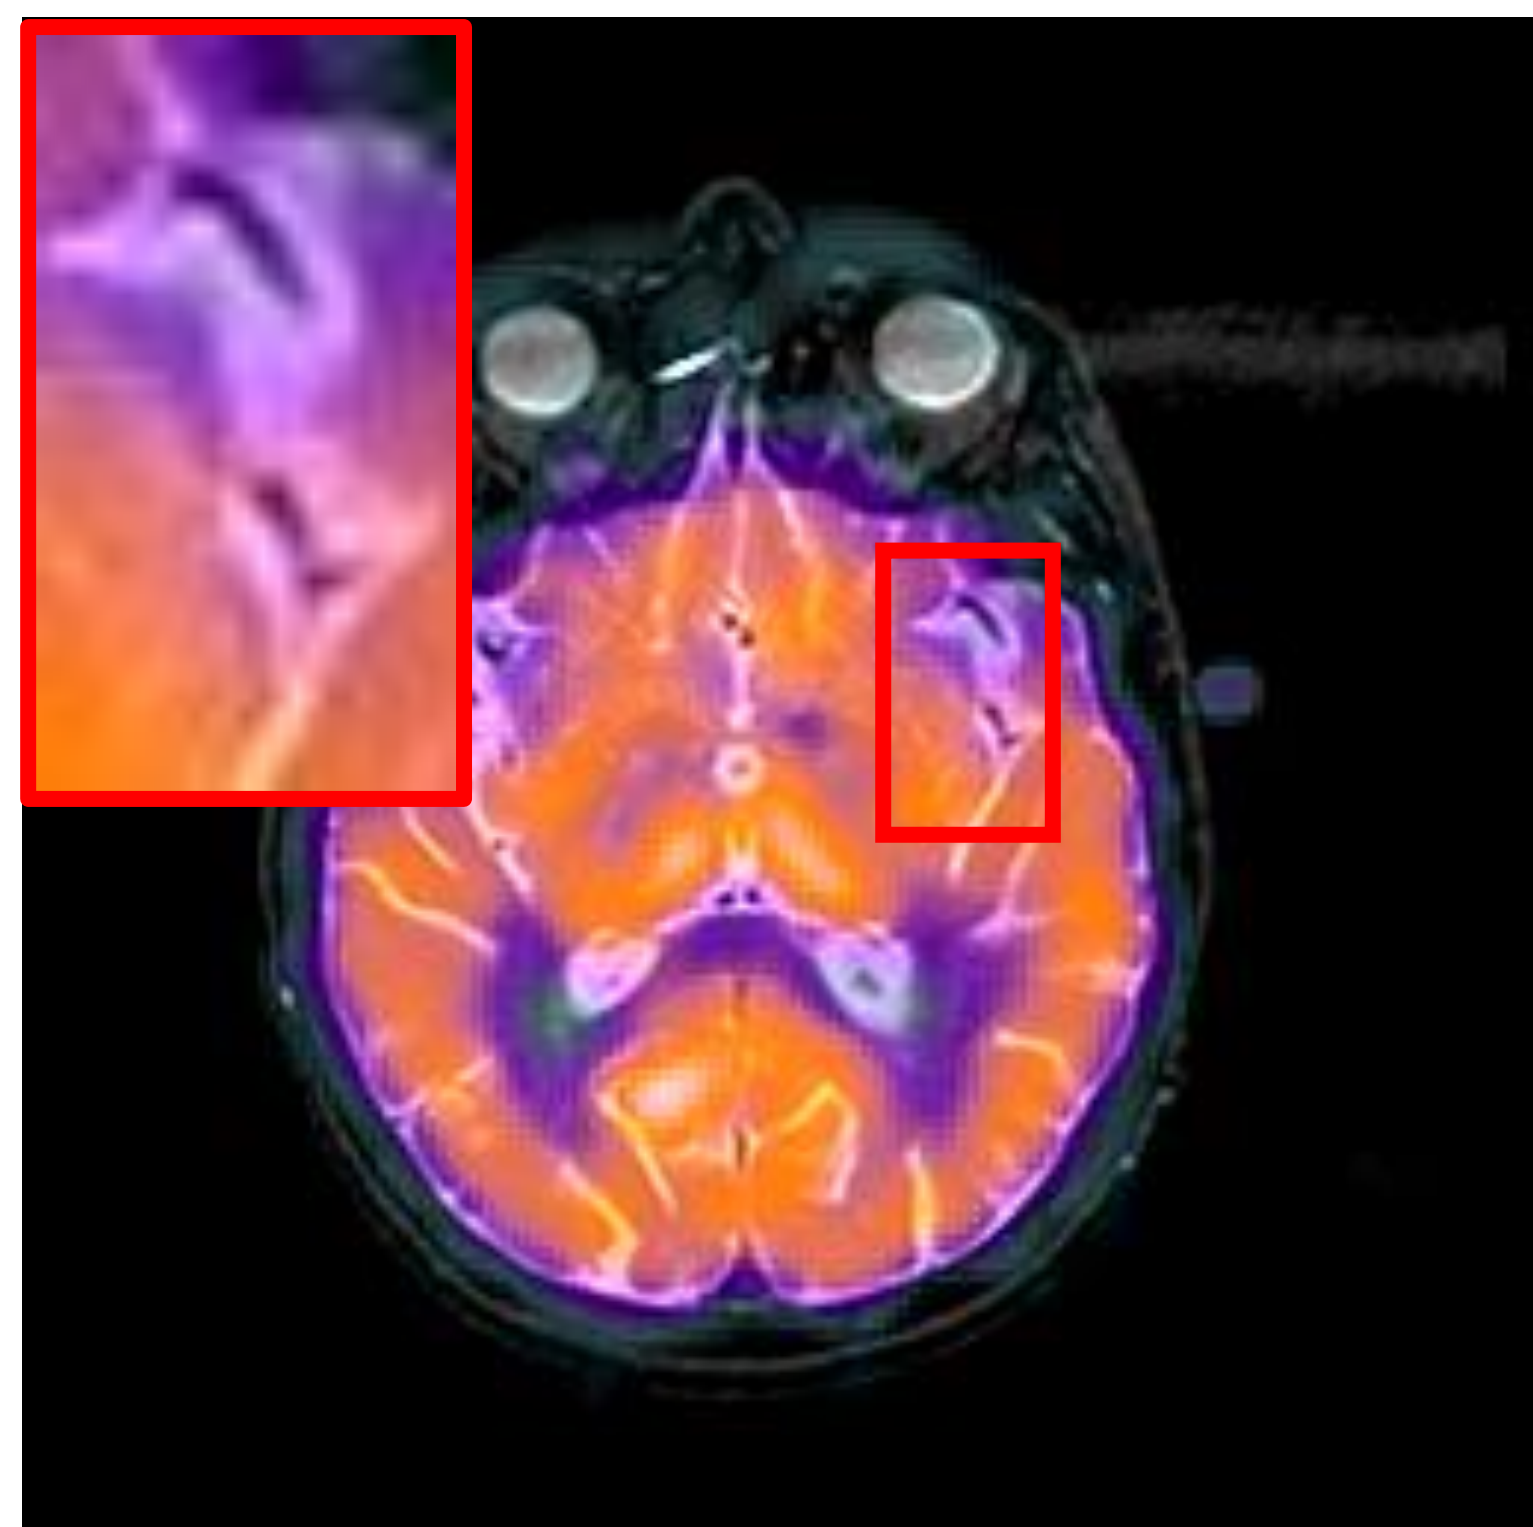

DDFM [8]

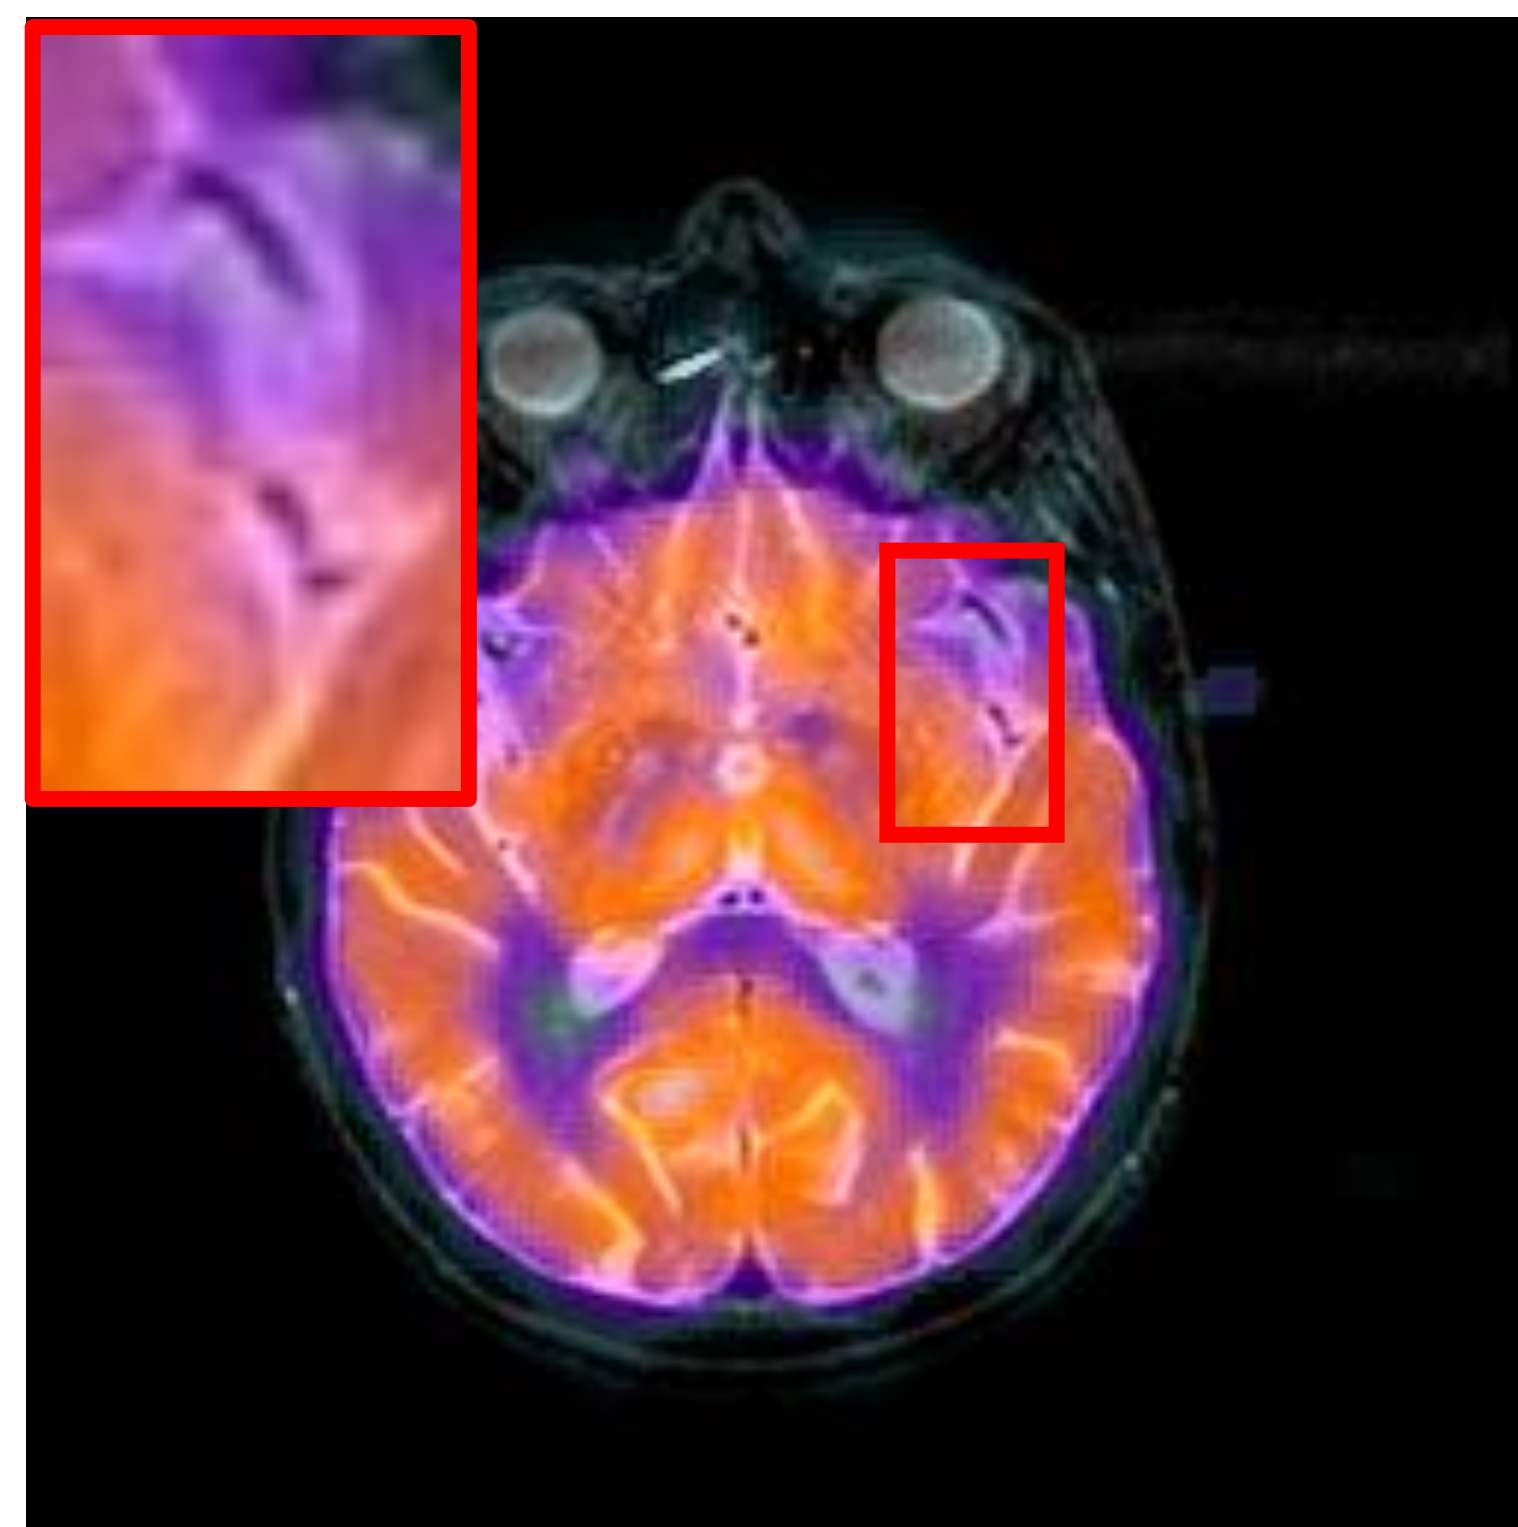

Dif-Fusion [5]

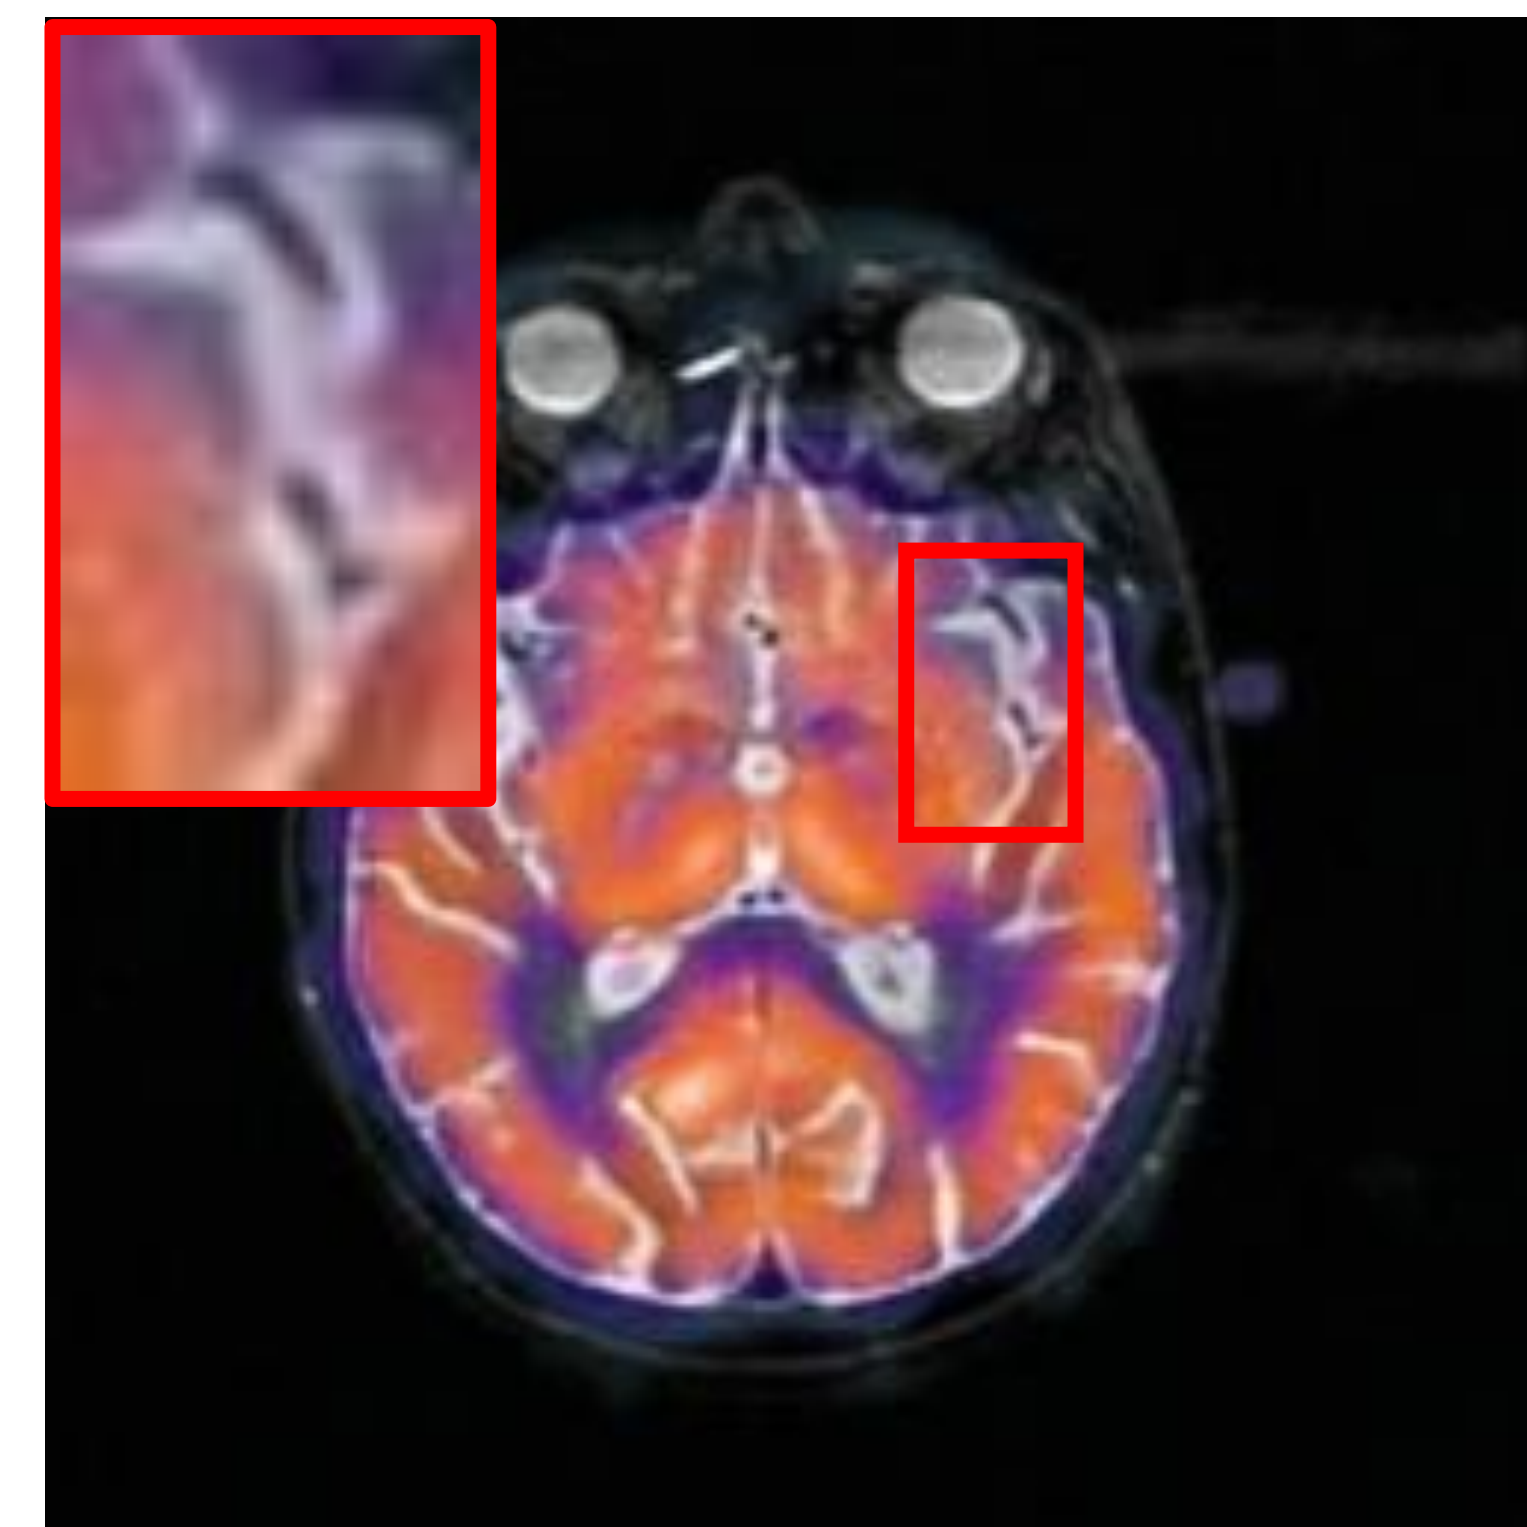**DCAFuse (Ours)**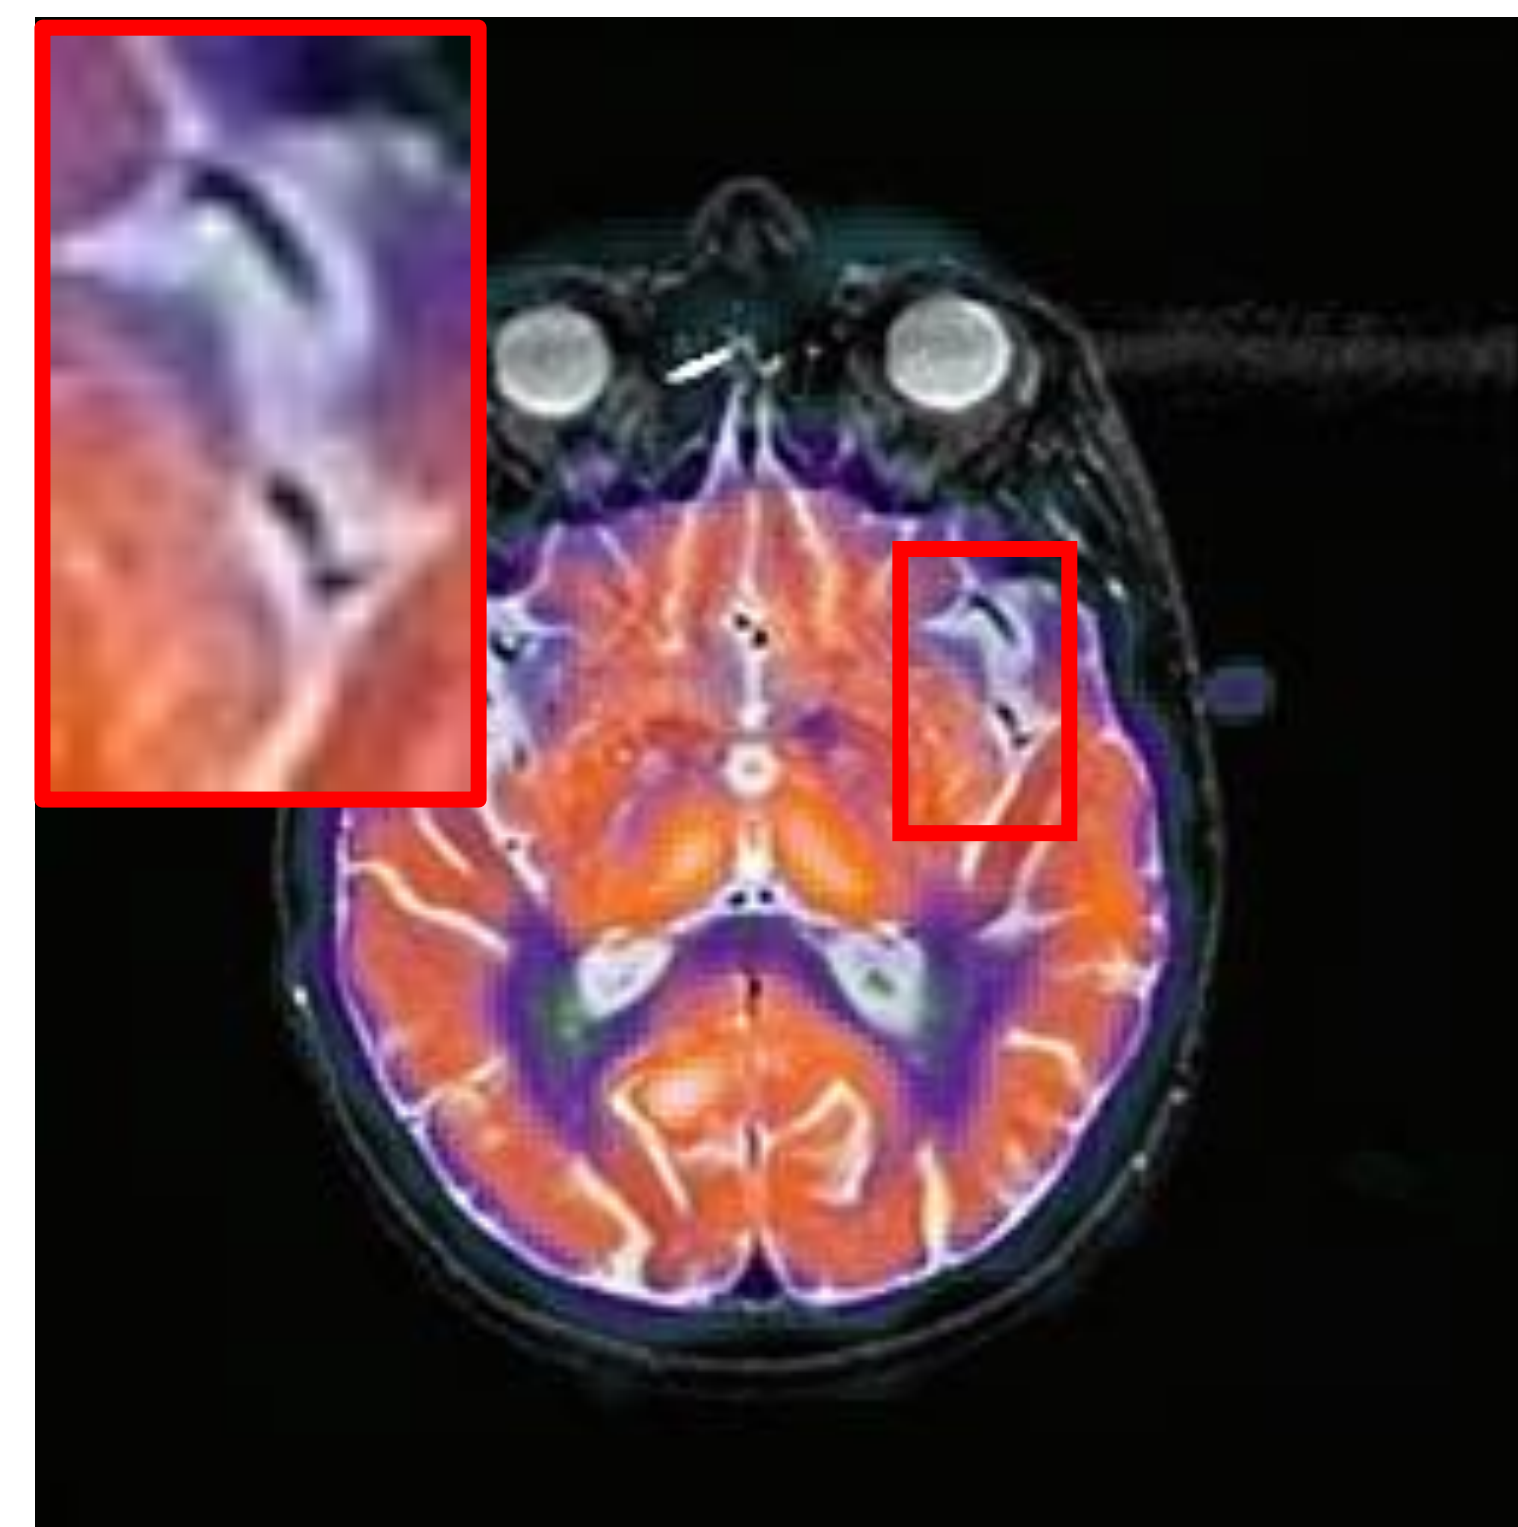

Supplement: supplementary_material [file attachment]
